# Supplementary material for: Dairy Product Consumption in Relation to Incident Prediabetes and Longitudinal Insulin Resistance in the Rotterdam Study
Source: Nutrients. 2022 Jan 18;14(3):415. doi: 10.3390/nu14030415 (PMC8840212; doi:10.3390/nu14030415)
Supplement: Supplementary file 1 [file nutrients-14-00415-s001.zip › nutrients-1544296-supplementary.pdf]

## Supplemental tables and figures

Dairy product consumption in relation to incident prediabetes and longitudinal insulin resistance in the Rotterdam Study

Isabel AL Slurink

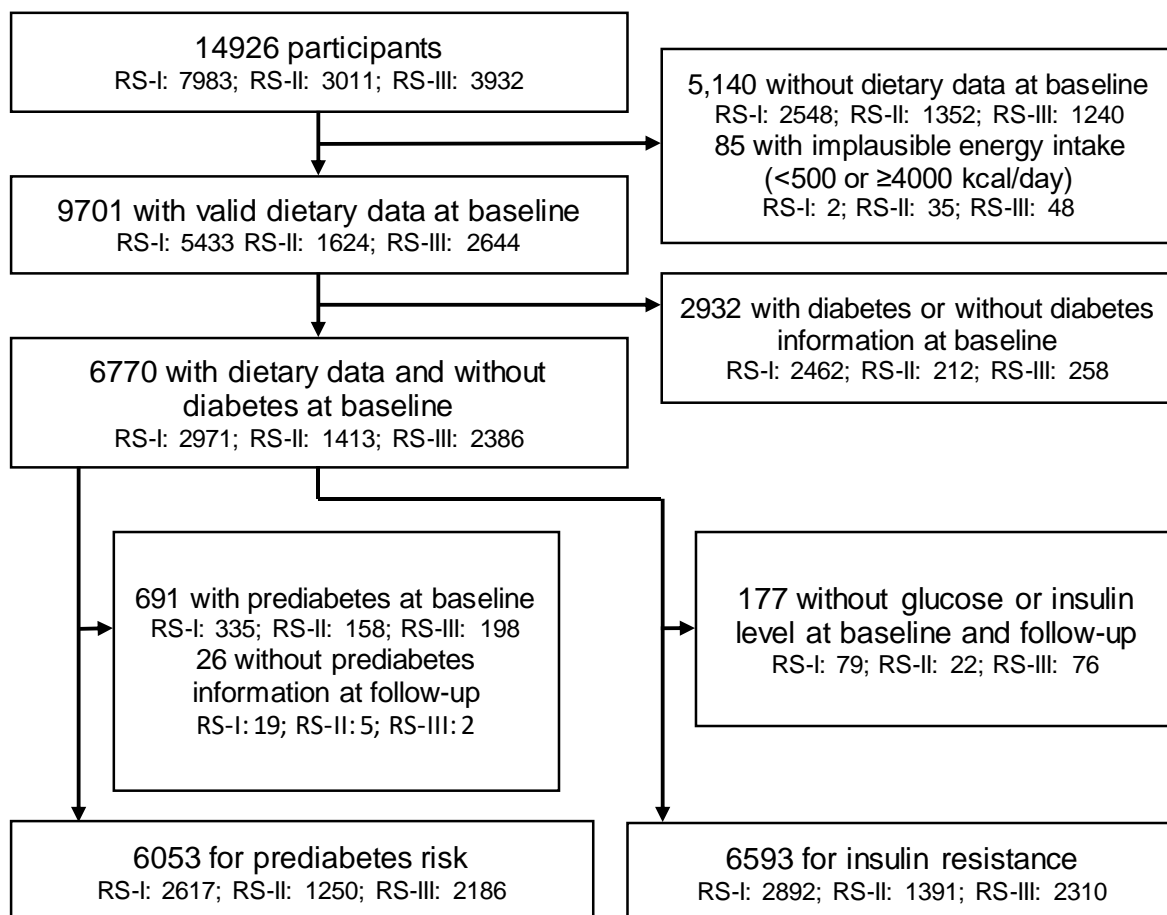

**Figure S1**

Flow-chart for inclusion of participants in the analyses for prediabetes and longitudinal insulin resistance.

**Table S1.** Grouping of dairy products included for the present analysis of the Rotterdam Studies.

| Dairy product         | Included dairy types                                                                                                                                                                                      |
|-----------------------|-----------------------------------------------------------------------------------------------------------------------------------------------------------------------------------------------------------|
| Total dairy           | All dairy products                                                                                                                                                                                        |
| High-fat <sup>1</sup> | All high-fat dairy products                                                                                                                                                                               |
| Low-fat <sup>1</sup>  | All low-fat dairy products                                                                                                                                                                                |
| Fermented dairy       |                                                                                                                                                                                                           |
| High-fat <sup>2</sup> | High-fat yogurt, high-fat cheese, full fat curd, full fat fruit curd                                                                                                                                      |
| Low-fat               | Low-fat yogurt, low-fat cheese, semi-skimmed curd, skimmed curd, semi-skimmed fruit curd, skimmed fruit curd                                                                                              |
| Milk, all types       |                                                                                                                                                                                                           |
| High-fat              | Full fat milk, full fat chocolate milk, milk powder, full fat milk added to the coffee                                                                                                                    |
| Low-fat               | Semi-skimmed milk, skimmed milk, buttermilk, semi-skimmed chocolate milk, skimmed chocolate milk, semi-skimmed milk added to the coffee, skimmed milk added to the coffee                                 |
| Yogurt                |                                                                                                                                                                                                           |
| High-fat              | Full fat yogurt, full fat fruit yogurt                                                                                                                                                                    |
| Low-fat <sup>3</sup>  | Semi-skimmed yogurt, skimmed yogurt, semi-skimmed fruit yogurt skimmed fruit yogurt                                                                                                                       |
| Cheese                |                                                                                                                                                                                                           |
| High-fat              | 40+ cheese (e.g., Edam), 48+ cheese (e.g. Gouda, cheddar, cheese spread, goat cheese), full fat luxury cheese (e.g. cream brie, cream cheese, mon chou), cheese cubes, grated cheese, feta, cheese fondue |
| Low-fat               | 20+ and 30+ cheese (e.g., cheese spread, cottage cheese), low-fat luxury cheese (e.g. brie, goat cheese)                                                                                                  |
| Cream (high-fat)      | Whipped cream, coffee cream, semi-skimmed coffee cream, sour cream, crème fraîche, cooking cream                                                                                                          |
| Ice cream (high-fat)  | Ice cream                                                                                                                                                                                                 |

1 High-fat dairy includes full fat custard for RS-I and RS-III. Low-fat dairy includes skimmed custard for RS-I.

2 Includes mousse and chipolata pudding in RS-III

3 Includes skimmed custard, semi-skimmed curd, skimmed curd, semi-skimmed fruit curd and skimmed fruit curd in RS-III.

**Table S2.** Missing values of covariates in participants before imputation.

|                                                  | Study population<br><i>n</i> =6770 | Analyses of prediabetes<br><i>n</i> =6053 | Analyses of HOMA-IR<br><i>n</i> =5403 |
|--------------------------------------------------|------------------------------------|-------------------------------------------|---------------------------------------|
| Educational level, <i>n</i> (%)                  | 43 (0.6)                           | 34 (0.6)                                  | 43 (0.7)                              |
| Smoking, <i>n</i> (%)                            | 33 (0.5)                           | 27 (0.4)                                  | 33 (0.5)                              |
| Physical activity (MET-hours/week), <i>n</i> (%) | 265 (3.9)                          | 233 (3.8)                                 | 237 (3.6)                             |
| Waist circumference, <i>n</i> (%)                | 312 (4.6)                          | 277 (4.6)                                 | <i>Repeated measures available</i>    |
| Cholesterol, <i>n</i> (%)                        | 151 (2.2)                          | 143 (2.4)                                 | <i>Repeated measures available</i>    |
| Hypertension, <i>n</i> (%)                       | 58 (0.9)                           | 52 (0.9)                                  | <i>Repeated measures available</i>    |
| Triglycerides, <i>n</i> (%)                      | 238 (3.5)                          | 211 (3.5)                                 | <i>Repeated measures available</i>    |

For all covariates of all analyses, only education level, smoking status, physical activity, and baseline waist circumference had missing values before imputation.

**Table S3.** Baseline characteristics of study population (*n*=6,770) by specific dairy product types.<sup>1</sup>

|                                         | High-fat milk                 |                      | Low-fat milk         |                      | High-fat yogurt               |                     | Low-fat cheese                |                     |
|-----------------------------------------|-------------------------------|----------------------|----------------------|----------------------|-------------------------------|---------------------|-------------------------------|---------------------|
|                                         | Zero intake<br><i>n</i> =3358 | T3<br><i>n</i> =1181 | Q1<br><i>n</i> =1787 | Q4<br><i>n</i> =1667 | Zero intake<br><i>n</i> =5150 | T3<br><i>n</i> =484 | Zero intake<br><i>n</i> =4804 | T3<br><i>n</i> =665 |
| Total dairy intake (servings/day)       | 0 ± 0                         | 1.1 ± 0.58           | 0 ± 0                | 2.3 ± 0.6            | 0 ± 0                         | 0.9 ± 0.3           | 0                             | 2.1 ± 0.5           |
| Range                                   | 0.0 - 0.0                     | 0.2 - 14.4           | 0.0 - 0.1            | 1.1 - 12.2           | 0.0 - 0.0                     | 0.4 - 7.4           | 0.0                           | 0.9 - 15.0          |
| Age at dietary assessment (years)       | 61.1 ± 3.6                    | 62.2 ± 4.2           | 62.1 ± 4.0           | 61.2 ± 3.8           | 61.7 ± 3.9                    | 62.8 ± 4.0          | 62.2 ± 4.0                    | 60.6 ± 3.2          |
| Sex female (%)                          | 60.1                          | 55.3                 | 57.3                 | 55.4                 | 57.9                          | 64.7                | 54.5                          | 69.0                |
| BMI (kg/m <sup>2</sup> )                | 26.9 ± 2.3                    | 26.4 ± 2.2           | 26.3 ± 2.3           | 26.8 ± 2.2           | 26.8 ± 2.2                    | 25.7 ± 2.0          | 26.5 ± 2.2                    | 27.0 ± 2.5          |
| Waist circumference (cm)                | 91.5 ± 6.7                    | 90.8 ± 6.5           | 90.7 ± 6.9           | 92.0 ± 6.9           | 91.5 ± 6.7                    | 89.6 ± 5.7          | 91.4 ± 6.7                    | 90.2 ± 6.9          |
| Education level (%)                     |                               |                      |                      |                      |                               |                     |                               |                     |
| Primary education                       | 10.3                          | 14.9                 | 11.9                 | 12.2                 | 11.6                          | 13.2                | 13.0                          | 8.3                 |
| Lower education                         | 40.7                          | 39.5                 | 40.8                 | 37.1                 | 41.7                          | 39.7                | 41.0                          | 41.8                |
| Intermediate                            | 29.9                          | 26.9                 | 29.2                 | 32.0                 | 28.5                          | 29.1                | 29.8                          | 28.2                |
| Higher                                  | 19.0                          | 18.8                 | 18.2                 | 18.7                 | 18.2                          | 18.0                | 16.2                          | 21.7                |
| Smoking (%)                             |                               |                      |                      |                      |                               |                     |                               |                     |
| Never                                   | 31.6                          | 32.1                 | 30.5                 | 33.7                 | 31.0                          | 38.8                | 31.6                          | 34.9                |
| Ever                                    | 45.5                          | 42.8                 | 42.4                 | 45.3                 | 46.1                          | 41.1                | 44.8                          | 45.8                |
| Current                                 | 22.9                          | 25.2                 | 27.1                 | 21.0                 | 22.9                          | 20.0                | 23.6                          | 19.3                |
| Physical activity (MET-hours/week)      |                               |                      |                      |                      |                               |                     |                               |                     |
| Zutphen Physical Activity Questionnaire | 42.5 [17.5, 86.0]             | 46.3 [19.7, 81.1]    | 42.0 [15.0, 78.0]    | 43.0 [17.2, 87.7]    | 42.9 [17.4, 83.5]             | 46.0 [19.7, 83.5]   | 40.5 [16.0, 80.8]             | 50.3 [22.1, 86.9]   |
| LASA Physical Activity Questionnaire    | 81.1 [56.1, 113.7]            | 80.1 [53.5, 114.4]   | 80.0 [53.2, 112.0]   | 81.0 [56.7, 112.9]   | 78.2 [53.4, 109.6]            | 84.7 [62.0, 126.5]  | 78.5 [53.4, 111.9]            | 87.6 [62.9, 116.0]  |
| Family history diabetes mellitus        | 11.6                          | 14.1                 | 12.1                 | 12.7                 | 12.5                          | 15.1                | 15.1                          | 5.9                 |
| <i>Dietary intake</i>                   |                               |                      |                      |                      |                               |                     |                               |                     |
| Diet score                              | 6.7 ± 1.1                     | 6.7 ± 1.0            | 6.1 ± 1.1            | 7.2 ± 1.0            | 6.6 ± 1.1                     | 6.9 ± 1.1           | 6.4 ± 1.1                     | 7.4 ± 1.0           |
| Energy intake (kcal/day)                | 2029 ± 323                    | 2287 ± 342           | 2057 ± 350           | 2274 ± 336           | 2087 ± 331                    | 2288 ± 336          | 2137 ± 337                    | 2057 ± 303          |
| Total fat intake (E%)                   | 34.6 ± 3.7                    | 35.9 ± 3.4           | 35.8 ± 4.0           | 34.3 ± 3.5           | 34.8 ± 3.7                    | 35.0 ± 3.4          | 35.7 ± 3.6                    | 32.3 ± 3.3          |
| Total saturated fat intake (E%)         | 12.8 ± 1.6                    | 14.1 ± 1.6           | 13.5 ± 1.9           | 13.1 ± 1.5           | 12.9 ± 1.6                    | 13.7 ± 1.6          | 13.6 ± 1.6                    | 11.7 ± 1.4          |
| Total protein intake (E%)               | 17.0 ± 1.7                    | 16.4 ± 1.5           | 15.9 ± 1.6           | 17.7 ± 1.6           | 16.8 ± 1.7                    | 16.1 ± 1.5          | 16.3 ± 1.6                    | 18.7 ± 1.8          |
| Carbohydrate intake (E%)                | 43.9 ± 4.3                    | 44.8 ± 3.8           | 44.0 ± 4.7           | 45.1 ± 3.8           | 44.5 ± 4.3                    | 45.8 ± 3.9          | 44.2 ± 4.3                    | 45.5 ± 3.9          |
| Calcium intake (mg/day)                 | 1061 ± 236                    | 1238 ± 254           | 883 ± 223            | 1465 ± 243           | 1090 ± 251                    | 1271 ± 237          | 1069 ± 246                    | 1390 ± 246          |
| Sodium intake (mg/day)                  | 2300 ± 455                    | 2455 ± 456           | 2247 ± 467           | 2560 ± 447           | 2322 ± 464                    | 2403 ± 440          | 2326 ± 465                    | 2601 ± 477          |
| Alcohol intake (g/day)                  | 14.0 ± 9.8                    | 10.6 ± 8.4           | 13.4 ± 10.1          | 11.3 ± 8.7           | 12.9 ± 9.5                    | 11.0 ± 7.7          | 13.1 ± 9.6                    | 10.3 ± 7.8          |
| Vegetables (g/day)                      | 216.5 ± 69.3                  | 207.9 ± 68.8         | 204.0 ± 61.8         | 215.7 ± 72.3         | 210.2 ± 68.5                  | 205.5 ± 55.8        | 204.5 ± 66.1                  | 228.0 ± 84.1        |
| Fruit (g/day)                           | 233.7 ± 100.6                 | 210.9 ± 89.0         | 208.8 ± 101.0        | 233.7 ± 97.6         | 226.2 ± 100.2                 | 235.1 ± 87.2        | 220.6 ± 97.9                  | 266.7 ± 97.6        |
| Wholegrains (g/day)                     | 116.0 ± 43.4                  | 112.9 ± 41.7         | 104.6 ± 44.6         | 126.5 ± 43.0         | 114.9 ± 42.9                  | 119.8 ± 43.2        | 111.8 ± 43.7                  | 146.6 ± 43.0        |
| Legumes (g/day)                         | 16.4 ± 13.4                   | 16.2 ± 10.5          | 17.4 ± 16.2          | 16.2 ± 10.8          | 16.2 ± 12.6                   | 12.8 ± 8.2          | 16.4 ± 12.8                   | 17.6 ± 12.7         |
| Nuts (g/day)                            | 8.5 ± 8.3                     | 8.8 ± 7.8            | 8.4 ± 8.5            | 8.3 ± 7.2            | 8.4 ± 8.0                     | 8.8 ± 8.1           | 8.5 ± 8.1                     | 8.5 ± 7.1           |
| Red meat (g/day)                        | 93.8 ± 36.5                   | 97.0 ± 33.1          | 91.2 ± 40.5          | 97.6 ± 31.9          | 91.6 ± 36.5                   | 94.6 ± 36.9         | 97.5 ± 38.6                   | 85.3 ± 34.6         |
| Fish (g/day)                            | 20.5 ± 12.9                   | 20.2 ± 12.1          | 19.5 ± 13.7          | 19.6 ± 12.1          | 20.1 ± 12.8                   | 18.4 ± 11.7         | 19.5 ± 12.6                   | 22.4 ± 13.3         |
| Tea (g/day)                             | 282.4 ± 161.5                 | 291.6 ± 156.1        | 297.7 ± 168.2        | 263.6 ± 147.2        | 285.8 ± 157.6                 | 250.7 ± 122.3       | 267.8 ± 148.6                 | 314.3 ± 155.7       |
| Coffee (g/day)                          | 483.2 ± 162.2                 | 500.8 ± 160.7        | 476.7 ± 169.0        | 475.4 ± 149.0        | 471.3 ± 152.1                 | 476.3 ± 141.5       | 477.2 ± 155.9                 | 481.6 ± 142.2       |
| Sugar sweetened beverages (g/day)       | 87.9 ± 74.4                   | 111.1 ± 79.6         | 94.7 ± 78.3          | 95.5 ± 74.5          | 94.6 ± 75.9                   | 101.5 ± 72.6        | 97.0 ± 78.0                   | 75.8 ± 60.0         |

<sup>1</sup> Dairy product types significantly associated with prediabetes risk and longitudinal insulin resistance.

Values are mean ± SD for continuous variables with a normal distribution (pooled), or median (25th percentile (75th percentile) for continuous variables with a skewed distribution; percentages for categorical variables, based on unimputed data.

Abbreviations: RS, Rotterdam Study; SD, standard deviation; E%, percentage of total energy intake; MET, metabolic equivalent of task; T; Tertile, Q; Quartile.

**Table S4.** Baseline characteristics of study population by sub-cohort (n=6770).

|                                         | <b>RS-I</b><br><i>n</i> =2971 | <b>RS-II</b><br><i>n</i> =1413 | <b>RS-III</b><br><i>n</i> =2386 | <b>Pooled</b><br><i>n</i> =6770 |
|-----------------------------------------|-------------------------------|--------------------------------|---------------------------------|---------------------------------|
| Total dairy intake (servings/day)       | 2.1 ± 1.3                     | 1.9 ± 1.4                      | 1.7 ± 1.3                       | 1.9 ± 0.8                       |
| Range                                   | 0-12.5                        | 0-12.3                         | 0-15.1                          | 0-15.1                          |
| Age at dietary assessment (years)       | 65.5 ± 6.7                    | 63.6 ± 7.2                     | 56.8 ± 6.4                      | 61.7 ± 3.9                      |
| Sex, female (%)                         | 59.6                          | 55.1                           | 59.9                            | 58.7                            |
| BMI (kg/m <sup>2</sup> )                | 26.0 ± 3.4                    | 27.0 ± 4.0                     | 27.2 ± 4.3                      | 26.6 ± 2.2                      |
| Waist circumference (cm)                | 88.8 ± 10.8                   | 93.0 ± 11.8                    | 92.1 ± 12.1                     | 91.1 ± 6.7                      |
| Education level (%)                     |                               |                                |                                 |                                 |
| Primary education                       | 15.8                          | 7.2                            | 9.5                             | 11.8                            |
| Lower education                         | 43.8                          | 45.8                           | 34.5                            | 40.9                            |
| Intermediate                            | 30.3                          | 28.8                           | 27.3                            | 28.9                            |
| Higher                                  | 10.1                          | 18.1                           | 28.7                            | 18.3                            |
| Smoking (%)                             |                               |                                |                                 |                                 |
| Never                                   | 33.9                          | 29.1                           | 32.1                            | 32.2                            |
| Ever                                    | 44.7                          | 47.8                           | 43.9                            | 45.0                            |
| Current                                 | 21.5                          | 23.1                           | 24.0                            | 22.7                            |
| Physical activity (MET-hours/week)      |                               |                                |                                 |                                 |
| Zutphen Physical Activity Questionnaire | 80.7 [55.6, 116.3]            | 77.3 [53.0, 104.6]             | NA                              |                                 |
| LASA Physical Activity Questionnaire    | NA                            | NA                             | 42.9 [17.7, 82.5]               |                                 |
| Family history diabetes mellitus        | 21.9                          | 15.2                           | NA                              |                                 |
| <i>Dietary intake</i>                   |                               |                                |                                 |                                 |
| Diet score                              | 6.9 ± 1.8                     | 6.1 ± 1.8                      | 7.0 ± 1.9                       | 6.7 ± 1.1                       |
| Energy intake (kcal/day)                | 1984 ± 502                    | 2154 ± 569                     | 2309 ± 714                      | 2113 ± 333                      |
| Total fat intake (E%)                   | 35.0 ± 6.0                    | 39.0 ± 7.0                     | 32.0 ± 6.0                      | 35.1 ± 3.6                      |
| Total saturated fat intake (E%)         | 14.0 ± 3.0                    | 15.0 ± 3.0                     | 11.0 ± 3.0                      | 13.2 ± 1.6                      |
| Total protein intake (E%)               | 17.0 ± 3.0                    | 17.0 ± 3.0                     | 16.0 ± 3.0                      | 16.7 ± 1.7                      |
| Carbohydrate intake (E%)                | 45.0 ± 7.0                    | 42.0 ± 8.0                     | 46.0 ± 7.0                      | 44.5 ± 4.2                      |
| Calcium intake (mg/day)                 | 1129 ± 397                    | 1098 ± 464                     | 1093 ± 456                      | 1109 ± 251                      |
| Sodium intake (mg/day)                  | 2206 ± 657                    | 2536 ± 1005                    | 2439 ± 860                      | 2344 ± 463                      |
| Alcohol intake (g/day)                  | 4.5 [0.4, 15.4]               | 8.7 [0.7, 22.6]                | 8.2 [1.5, 19.8]                 | 6.6 [0.7, 18.8]                 |
| Vegetables (g/day)                      | 209 ± 99                      | 198 ± 110                      | 251 ± 186                       | 211 ± 69                        |
| Fruit (g/day)                           | 239 ± 135                     | 179 ± 161                      | 352 ± 321                       | 228 ± 98                        |
| Wholegrains (g/day)                     | 71 ± 72                       | 146 ± 72                       | 132 ± 82                        | 116 ± 43                        |
| Legumes (g/day)                         | 18 ± 18                       | 15 ± 29                        | 16 ± 22                         | 16.5 ± 12.5                     |
| Nuts (g/day)                            | 7.0 ± 12.4                    | 7.4 ± 13.1                     | 12.7 ± 16.4                     | 8.5 ± 7.9                       |
| Red meat (g/day)                        | 115 ± 106                     | 108 ± 66                       | 80 ± 48                         | 93 ± 36                         |
| Fish (g/day)                            | 15.9 ± 18.3                   | 20.3 ± 22.7                    | 31.3 ± 29.5                     | 20 ± 13                         |
| Tea (g/day)                             | 369 ± 260                     | 349 ± 336                      | 190 ± 236                       | 288 ± 155                       |
| Coffee (g/day)                          | 494 ± 241                     | 498 ± 285                      | 416 ± 269                       | 471 ± 152                       |
| Sugar sweetened beverages (g/day)       | 67 ± 109                      | 148 ± 177                      | 102 ± 124                       | 94 ± 74                         |

Values are mean ± SD for continuous variables with a normal distribution (pooled), or median (25th percentile (75th percentile) for continuous variables with a skewed distribution; percentages for categorical variables, based on unimputed data.

Abbreviations: RS, Rotterdam Study; SD, standard deviation; E%, percentage of total energy intake; MET, metabolic equivalent of task.

**Table S5.** Baseline characteristics of the study population, stratified by whether or not participants were included in the analysis of this study.

|                                      | Included participants<br>(n = 6770) | Excluded participants<br>(n = 8162) |
|--------------------------------------|-------------------------------------|-------------------------------------|
| Age (years)                          | 62.0 ± 7.8                          | 69.2 ± 11.4                         |
| Sex, female (%)                      | 58.7                                | 59.4                                |
| Body Mass Index (kg/m <sup>2</sup> ) | 26.6 ± 3.9                          | 27.1 ± 4.3                          |
| Waist circumference (cm)             | 90.8 ± 11.6                         | 93.4 ± 12.2                         |
| Fasting glucose (mmol/L)             | 5.5 ± 0.6                           | 6.6 ± 2.2                           |
| HOMA-IR                              | 2.9 ± 2.4                           | 5.6 ± 13.0                          |
| Physical activity (MET-hours/week)   |                                     |                                     |
| LASA questionnaire (RS-I and RS-II)  | 79.7 [54.7, 112.1]                  | 67.2 [40.2, 97.6]                   |
| Zutphen Questionnaire (RS-III)       | 42.9 [17.7, 82.5]                   | 37.3 [16.5, 80.4]                   |
| Education level (%)                  |                                     |                                     |
| Primary                              | 11.8                                | 24.7                                |
| Lower                                | 40.9                                | 38.8                                |
| Intermediate                         | 28.9                                | 24.8                                |
| Higher                               | 18.3                                | 11.6                                |
| Smoking (%)                          |                                     |                                     |
| Never                                | 32.2                                | 34.0                                |
| Ever                                 | 45.0                                | 40.4                                |
| Current                              | 22.7                                | 25.6                                |

Values are mean ± SD for continuous variables with a normal distribution (pooled), or median [IQR] for continuous variables with a skewed distribution; percentages for categorical variables, based on unimputed data. Excluded participants were those without dietary data at baseline (*n*=5,140), implausible energy intake (*n*=85) or with diabetes or without diabetes information at baseline (*n*=2,932).

Abbreviations: MET, metabolic equivalent of task; RS, Rotterdam Study; SD, standard deviation.

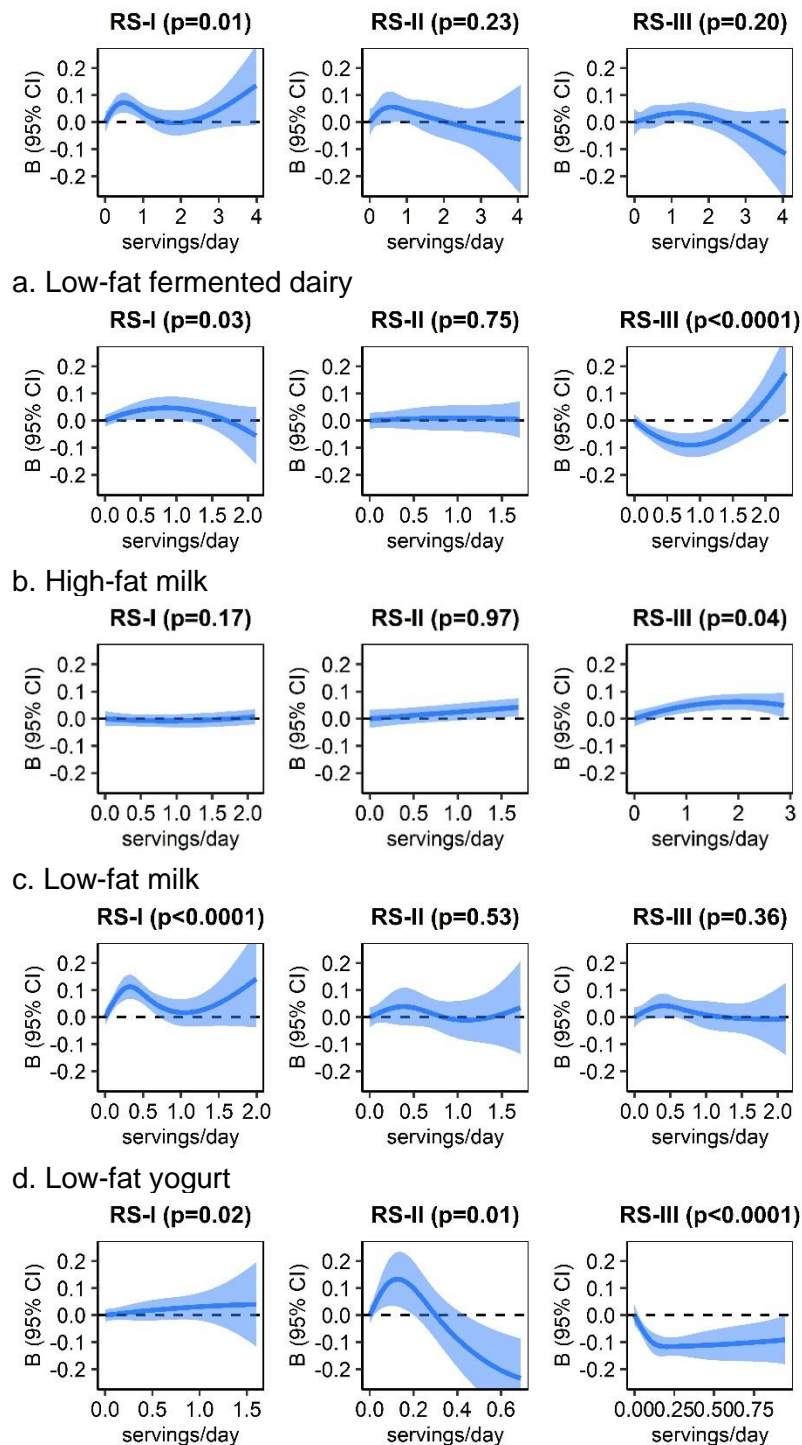

**Figure S2**

Non-linear relationship of dairy product types and longitudinal HOMA-IR by sub-cohort. Outliers in dairy intakes were excluded (defined as the mean + 3 SD). Dairy product types for which non-linear associations (polynomials or natural splines) were present in at least one sub-cohort are presented.

**Table S6.** Associations of dairy product types and prediabetes in the Rotterdam Studies, pooled and by sub-cohort (n=6053).

|                                 | <b>Pooled effect estimates</b> | <b>RS-I</b>           | <b>RS-II</b>          | <b>RS-III</b>         |
|---------------------------------|--------------------------------|-----------------------|-----------------------|-----------------------|
| n/N                             | 1139/6053                      | 519/2457              | 290/1193              | 330/2139              |
|                                 | Continuous HR (95%CI)          | Continuous HR (95%CI) | Continuous HR (95%CI) | Continuous HR (95%CI) |
| <b>Total dairy</b>              |                                |                       |                       |                       |
| Median intake                   | 3.3                            | 3.5                   | 3.8                   | 2.8                   |
| Model 1                         | 1.02 (0.99-1.05)               | 1.07 (1.02-1.13)**    | 1.02 (0.97-1.07)      | 0.92 (0.85-0.98)*     |
| Model 2                         | 1.03 (1.00-1.07)               | 1.08 (1.03-1.14)**    | 1.03 (0.98-1.08)      | 0.95 (0.88-1.02)      |
| <b>High-fat dairy</b>           |                                |                       |                       |                       |
| Median intake                   | 1.7                            | 1.9                   | 2.0                   | 1.1                   |
| Model 1                         | 1.00 (0.96-1.04)               | 1.04 (0.98-1.11)      | 1.00 (0.95-1.06)      | 0.91 (0.83-0.99)*     |
| Model 2                         | 1.00 (0.96-1.04)               | 1.04 (0.98-1.12)      | 1.00 (0.95-1.06)      | 0.92 (0.84-1.01)      |
| <b>Low-fat dairy</b>            |                                |                       |                       |                       |
| Median intake                   | 1.4                            | 1.4                   | 1.3                   | 1.4                   |
| Model 1                         | 1.03 (0.99-1.08)               | 1.06 (1.00-1.13)      | 1.04 (0.96-1.12)      | 0.96 (0.88-1.06)      |
| Model 2                         | 1.05 (1.01-1.10)*              | 1.07 (1.01-1.14)*     | 1.06 (0.99-1.14)      | 1.00 (0.91-1.10)      |
| <b>Fermented dairy</b>          |                                |                       |                       |                       |
| Median intake                   | 2.2                            | 2.4                   | 2.6                   | 1.9                   |
| Model 1                         | 1.02 (0.98-1.05)               | 1.05 (1.00-1.11)*     | 1.02 (0.97-1.07)      | 0.94 (0.86-1.02)      |
| Model 2                         | 1.03 (0.99-1.06)               | 1.06 (1.00-1.12)*     | 1.02 (0.97-1.07)      | 0.97 (0.89-1.06)      |
| <b>High-fat fermented dairy</b> |                                |                       |                       |                       |
| Median intake                   | 1.3                            | 1.6                   | 1.7                   | 0.9                   |
| Model 1                         | 1.03 (0.99-1.07)               | 1.07 (1.00-1.15)*     | 1.02 (0.97-1.07)      | 0.94 (0.85-1.04)      |
| Model 2                         | 1.03 (0.99-1.07)               | 1.07 (1.00-1.15)*     | 1.02 (0.96-1.07)      | 0.95 (0.86-1.06)      |
| <b>Low-fat fermented dairy</b>  |                                |                       |                       |                       |
| Median intake                   | 0.6                            | 0.5                   | 0.5                   | 0.7                   |
| Model 1                         | 0.99 (0.94-1.05)               | 1.01 (0.93-1.10)      | 0.99 (0.89-1.09)      | 0.96 (0.86-1.07)      |
| Model 2                         | 1.01 (0.96-1.07)               | 1.03 (0.94-1.12)      | 1.01 (0.91-1.11)      | 1.01 (0.90-1.13)      |
| <b>Total milk</b>               |                                |                       |                       |                       |
| Median intake                   | 1.0                            | 1.2                   | 1.1                   | 0.7                   |
| Model 1                         | 1.00 (0.95-1.06)               | 1.05 (0.98-1.14)      | 1.00 (0.91-1.11)      | 0.89 (0.80-1.00)*     |
| Model 2                         | 1.02 (0.97-1.08)               | 1.06 (0.99-1.15)      | 1.05 (0.95-1.16)      | 0.92 (0.82-1.03)      |
| <b>High-fat milk</b>            |                                |                       |                       |                       |
| Median intake                   | 0.0                            | 0.1                   | 0.0                   | 0.0                   |
| Model 1                         | 0.87 (0.78-0.97)*              | 0.95 (0.82-1.10)      | 0.61 (0.42-0.89)**    | 0.84 (0.70-1.00)      |
| Model 2                         | 0.88 (0.79-0.99)*              | 0.95 (0.81-1.10)      | 0.62 (0.43-0.91)*     | 0.86 (0.72-1.04)      |
| <b>Low-fat milk</b>             |                                |                       |                       |                       |
| Median intake                   | 0.8                            | 1.0                   | 0.8                   | 0.5                   |
| Model 1                         | 1.05 (0.99-1.11)               | 1.07 (0.99-1.15)      | 1.06 (0.97-1.17)      | 0.94 (0.82-1.09)      |
| Model 2                         | 1.07 (1.01-1.13)*              | 1.08 (1.00-1.16)*     | 1.11 (1.00-1.23)*     | 0.96 (0.84-1.11)      |
| <b>Total yogurt</b>             |                                |                       |                       |                       |
| Median intake                   | 0.4                            | 0.3                   | 0.1                   | 0.4                   |
| Model 1                         | 0.88 (0.78-0.98)*              | 0.89 (0.74-1.07)      | 0.90 (0.72-1.13)      | 0.85 (0.71-1.01)      |
| Model 2                         | 0.92 (0.82-1.02)               | 0.89 (0.73-1.07)      | 0.95 (0.76-1.20)      | 0.92 (0.77-1.09)      |
| <b>High-fat yogurt</b>          |                                |                       |                       |                       |
| Median intake                   | 0.0                            | 0.0                   | 0.0                   | 0.0                   |
| Model 1                         | 0.66 (0.50-0.88)**             | 0.76 (0.54-1.08)      | 0.45 (0.19-1.05)      | 0.51 (0.27-0.97)*     |
| Model 2                         | 0.67 (0.51-0.89)**             | 0.76 (0.54-1.07)      | 0.47 (0.20-1.10)      | 0.55 (0.29-1.04)      |
| <b>Low-fat yogurt</b>           |                                |                       |                       |                       |
| Median intake                   | 0.1                            | 0.1                   | 0.0                   | 0.4                   |
| Model 1                         | 0.94 (0.84-1.06)               | 0.96 (0.77-1.19)      | 0.98 (0.79-1.22)      | 0.91 (0.77-1.08)      |
| Model 2                         | 0.99 (0.88-1.11)               | 0.97 (0.78-1.21)      | 1.03 (0.82-1.29)      | 0.98 (0.83-1.16)      |
| <b>Total cheese</b>             |                                |                       |                       |                       |
| Median intake                   | 1.5                            | 1.7                   | 2.0                   | 1.3                   |
| Model 1                         | 1.05 (1.01-1.08)**             | 1.11 (1.04-1.18)**    | 1.03 (0.98-1.08)      | 0.98 (0.89-1.08)      |
| Model 2                         | 1.05 (1.01-1.09)**             | 1.11 (1.04-1.19)**    | 1.02 (0.97-1.08)      | 1.00 (0.91-1.10)      |
| <b>High-fat cheese</b>          |                                |                       |                       |                       |
| Median intake                   | 1.2                            | 1.5                   | 1.6                   | 0.8                   |
| Model 1                         | 1.04 (1.00-1.07)*              | 1.08 (1.02-1.16)*     | 1.03 (0.98-1.08)      | 0.96 (0.87-1.07)      |
| Model 2                         | 1.03 (1.00-1.08)               | 1.08 (1.01-1.16)*     | 1.02 (0.97-1.08)      | 0.97 (0.87-1.08)      |
| <b>Low-fat cheese</b>           |                                |                       |                       |                       |
| Median intake                   | 0.0                            | 0.0                   | 0.0                   | 0.1                   |
| Model 1                         | 1.05 (0.97-1.14)               | 1.10 (0.97-1.26)      | 1.00 (0.86-1.16)      | 1.03 (0.89-1.20)      |

|                  |                  |                  |                  |                  |
|------------------|------------------|------------------|------------------|------------------|
| Model 2          | 1.06 (0.97-1.14) | 1.11 (0.97-1.27) | 1.00 (0.88-1.14) | 1.07 (0.92-1.24) |
| <b>Cream</b>     |                  |                  |                  |                  |
| Median intake    | 0.0              | 0.0              | 0.0              | 0.1              |
| Model 1          | 1.04 (0.93-1.17) | 1.06 (0.94-1.19) | 0.93 (0.52-1.66) | 0.91 (0.59-1.41) |
| Model 2          | 1.03 (0.92-1.16) | 1.05 (0.93-1.18) | 0.89 (0.50-1.59) | 0.92 (0.59-1.42) |
| <b>Ice cream</b> |                  |                  |                  |                  |
| Median intake    | 0.0              | 0.0              | 0.0              | 0.1              |
| Model 1          | 0.94 (0.71-1.26) | 0.83 (0.38-1.81) | 0.93 (0.63-1.35) | 1.04 (0.61-1.77) |
| Model 2          | 0.94 (0.70-1.26) | 0.75 (0.34-1.65) | 0.96 (0.65-1.43) | 1.00 (0.58-1.73) |

<sup>1</sup> Continuous analyses in servings/day: milk, 200 mL; yogurt, 150 mL; cheese, 20 g; cream 3 g; ice cream, 50 g. Combined total dairy category: liquid dairy products, 200 mL; cheese, 20g. Model 1 included age (continuous), sex and energy intake (continuous). Model 2 was additionally adjusted for education (3 categories), smoking (3 categories), physical activity (continuous), alcohol consumption (4 categories), family history of diabetes (yes/no, RS-I and RS-II only) and food groups associated with type 2 diabetes including intakes of fruit, vegetables, wholegrains, legumes, nuts, tea, coffee, red meat, and sugar-sweetened beverages (SSB) (continuous). HR, Hazard Ratio. P value significance level: \*.05, \*\*.01, \*\*\*.001

**Table S7.** Associations of dairy product types and longitudinal insulin resistance in the Rotterdam Studies, pooled and by sub-cohort (n = 6593).

|                                 | <b>Pooled effect estimates</b><br><i>n</i> =6053 | <b>RS-I</b><br><i>n</i> =2892 | <b>RS-II</b><br><i>n</i> =1391 | <b>RS-III</b><br><i>n</i> =2310 |
|---------------------------------|--------------------------------------------------|-------------------------------|--------------------------------|---------------------------------|
|                                 | Continuous<br>B (95%CI)                          | Continuous<br>B (95%CI)       | Continuous<br>B (95%CI)        | Continuous<br>B (95%CI)         |
| <b>Total dairy</b>              |                                                  |                               |                                |                                 |
| Median intake                   | 3.3                                              | 3.5                           | 3.8                            | 2.8                             |
| Model 1                         | 0.00 (-0.01,0.01)                                | 0.00 (-0.01,0.01)             | 0.01 (-0.01,0.02)              | 0.00 (-0.02,0.01)               |
| Model 2                         | 0.00 (0.00,0.01)                                 | 0.00 (-0.01,0.02)             | 0.01 (-0.01,0.02)              | 0.00 (-0.01,0.01)               |
| <b>High-fat dairy</b>           |                                                  |                               |                                |                                 |
| Median intake                   | 1.7                                              | 1.9                           | 2.0                            | 1.1                             |
| Model 1                         | -0.01 (-0.01,0.00)                               | -0.01 (-0.02,0.01)            | 0.00 (-0.01,0.01)              | -0.01 (-0.03,0.00)              |
| Model 2                         | -0.01 (-0.02,0.00)                               | -0.01 (-0.02,0.01)            | 0.00 (-0.02,0.01)              | -0.01 (-0.03,0.00)              |
| <b>Low-fat dairy</b>            |                                                  |                               |                                |                                 |
| Median intake                   | 1.3                                              | 1.3                           | 1.3                            | 1.4                             |
| Model 1                         | 0.01 (0.00,0.02)                                 | 0.01 (-0.01,0.02)             | 0.02 (0.00,0.04)               | 0.01 (-0.01,0.03)               |
| Model 2                         | 0.02 (0.01,0.03)**                               | 0.01 (0.00,0.03)              | 0.02 (0.00,0.04)*              | 0.02 (0.00,0.04)*               |
| <b>Fermented dairy</b>          |                                                  |                               |                                |                                 |
| Median intake                   | 2.2                                              | 2.4                           | 2.6                            | 1.9                             |
| Model 1                         | -0.01 (-0.02,0.00)                               | -0.01 (-0.02,0.01)            | 0.00 (-0.01,0.01)              | -0.01 (-0.03,0.00)              |
| Model 2                         | 0.00 (-0.01,0.00)                                | 0.00 (-0.02,0.01)             | 0.00 (-0.02,0.01)              | -0.01 (-0.02,0.01)              |
| <b>High-fat fermented dairy</b> |                                                  |                               |                                |                                 |
| Median intake                   | 1.4                                              | 1.6                           | 1.7                            | 0.8                             |
| Model 1                         | 0.00 (-0.01,0.01)                                | -0.01 (-0.02,0.01)            | 0.00 (-0.01,0.01)              | -0.01 (-0.03,0.01)              |
| Model 2                         | 0.00 (-0.01,0.01)                                | 0.00 (-0.02,0.01)             | 0.00 (-0.02,0.01)              | -0.01 (-0.03,0.01)              |
| <b>Low-fat fermented dairy</b>  |                                                  |                               |                                |                                 |
| Median intake                   | 0.5                                              | 0.5                           | 0.5                            | 0.7                             |
| Model 1                         | -0.01 (-0.02,0.00)                               | -0.01 (-0.03,0.01)            | -0.01 (-0.04,0.01)             | -0.02 (-0.04,0.01)              |
| Model 2                         | 0.00 (-0.01,0.01)                                | 0.00 (-0.02,0.02)             | 0.00 (-0.03,0.02)              | 0.00 (-0.02,0.02)               |
| <b>Total milk</b>               |                                                  |                               |                                |                                 |
| Median intake                   | 1.0                                              | 1.2                           | 1.1                            | 0.7                             |
| Model 1                         | 0.01 (0.00,0.02)                                 | 0.00 (-0.02,0.02)             | 0.03 (0.01,0.06)*              | 0.01 (-0.01,0.03)               |
| Model 2                         | 0.01 (0.00,0.02)                                 | 0.00 (-0.02,0.02)             | 0.03 (0.01,0.06)**             | 0.01 (-0.01,0.02)               |
| <b>High-fat milk</b>            |                                                  |                               |                                |                                 |
| Median intake                   | 0.003                                            | 0.06                          | 0.04                           | 0                               |
| Model 1                         | -0.02 (-0.04,0.00)                               | -0.01 (-0.05,0.02)            | -0.02 (-0.07,0.04)             | -0.02 (-0.05,0.00)              |
| Model 2                         | -0.02 (-0.04,0.00)                               | -0.02 (-0.05,0.02)            | -0.02 (-0.08,0.04)             | -0.02 (-0.05,0.00)              |
| <b>Low-fat milk</b>             |                                                  |                               |                                |                                 |
| Median intake                   | 0.8                                              | 0.9                           | 0.8                            | 0.5                             |
| Model 1                         | 0.02 (0.01,0.04)***                              | 0.01 (-0.01,0.03)             | 0.04 (0.01,0.06)**             | 0.04 (0.01,0.07)**              |
| Model 2                         | 0.02 (0.01,0.04)***                              | 0.01 (-0.01,0.03)             | 0.04 (0.01,0.06)**             | 0.04 (0.01,0.06)**              |
| <b>Total yogurt</b>             |                                                  |                               |                                |                                 |
| Median intake                   | 0.4                                              | 0.3                           | 0.07                           | 0.4                             |
| Model 1                         | -0.03 (-0.05,-0.01)**                            | -0.01 (-0.06,0.03)            | -0.02 (-0.07,0.03)             | -0.04 (-0.07,-0.01)**           |
| Model 2                         | -0.02 (-0.04,0.00)                               | -0.01 (-0.05,0.04)            | -0.01 (-0.06,0.05)             | -0.03 (-0.06,0.00)              |
| <b>High-fat yogurt</b>          |                                                  |                               |                                |                                 |

|                        |                       |                    |                    |                       |
|------------------------|-----------------------|--------------------|--------------------|-----------------------|
| Median intake          | 0                     | 0                  | 0                  | 0                     |
| Model 1                | -0.08 (-0.13,-0.03)** | -0.05 (-0.12,0.02) | -0.11 (-0.25,0.03) | -0.11 (-0.19,-0.04)** |
| Model 2                | -0.08 (-0.13,-0.03)** | -0.04 (-0.11,0.03) | -0.11 (-0.25,0.03) | -0.11 (-0.18,-0.03)** |
| <b>Low-fat yogurt</b>  |                       |                    |                    |                       |
| Median intake          | 0.14                  | 0.14               | 0                  | 0.4                   |
| Model 1                | -0.02 (-0.04,0.01)    | 0.00 (-0.05,0.05)  | -0.01 (-0.06,0.05) | -0.03 (-0.06,0.00)    |
| Model 2                | 0.00 (-0.03,0.02)     | 0.01 (-0.04,0.06)  | 0.01 (-0.05,0.06)  | -0.01 (-0.04,0.02)    |
| <b>Total cheese</b>    |                       |                    |                    |                       |
| Median intake          | 1.5                   | 1.7                | 2                  | 1.3                   |
| Model 1                | 0.00 (-0.01,0.01)     | 0.00 (-0.02,0.02)  | 0.00 (-0.01,0.01)  | 0.00 (-0.02,0.02)     |
| Model 2                | 0.00 (-0.01,0.01)     | 0.00 (-0.02,0.02)  | 0.00 (-0.02,0.01)  | 0.01 (-0.01,0.02)     |
| <b>High-fat cheese</b> |                       |                    |                    |                       |
| Median intake          | 1.3                   | 1.5                | 1.7                | 0.8                   |
| Model 1                | 0.00 (-0.01,0.01)     | 0.00 (-0.02,0.01)  | 0.00 (-0.01,0.02)  | 0.00 (-0.02,0.02)     |
| Model 2                | 0.00 (-0.01,0.01)     | 0.00 (-0.02,0.02)  | 0.00 (-0.01,0.01)  | 0.00 (-0.02,0.02)     |
| <b>Low-fat cheese</b>  |                       |                    |                    |                       |
| Median intake          | 0                     | 0                  | 0                  | 0.08                  |
| Model 1                | 0.00 (-0.02,0.02)     | 0.01 (-0.02,0.05)  | -0.03 (-0.07,0.02) | 0.00 (-0.03,0.04)     |
| Model 2                | 0.01 (-0.01,0.03)     | 0.02 (-0.02,0.06)  | -0.01 (-0.06,0.03) | 0.02 (-0.01,0.05)     |
| <b>Cream</b>           |                       |                    |                    |                       |
| Median intake          | 0                     | 0                  | 0                  | 0.0821                |
| Model 1                | -0.01 (-0.04,0.01)    | 0.00 (-0.03,0.03)  | -0.10 (-0.23,0.04) | -0.11 (-0.19,-0.02)*  |
| Model 2                | -0.02 (-0.05,0.01)    | 0.00 (-0.03,0.03)  | -0.13 (-0.26,0.00) | -0.10 (-0.19,-0.02)*  |
| <b>Ice cream</b>       |                       |                    |                    |                       |
| Median intake          | 0                     | 0                  | 0                  | 0.0671                |
| Model 1                | 0.05 (0.00,0.10)*     | 0.00 (-0.17,0.17)  | 0.05 (0.00,0.11)*  | 0.05 (-0.05,0.16)     |
| Model 2                | 0.04 (-0.01,0.08)     | -0.04 (-0.21,0.13) | 0.06 (0.00,0.11)*  | -0.02 (-0.12,0.08)    |

<sup>1</sup> Continuous analyses in servings/day: milk, 200 mL; yogurt, 150 mL; cheese, 20 g; cream 3 g; ice cream, 50 g. Combined total dairy category: liquid dairy products, 200 mL; cheese, 20g. Model 1 included age (continuous), sex and energy intake (continuous). Model 2 was additionally adjusted for education (3 categories), smoking (3 categories), physical activity (continuous), alcohol consumption (4 categories), family history of diabetes (yes/no, RS-I and RS-II only) and food groups associated with type 2 diabetes including intakes of fruit, vegetables, wholegrains, legumes, nuts, tea, coffee, red meat, and sugar-sweetened beverages (SSB) (continuous). HR, Hazard Ratio. P value significance level: \*.05, \*\*.01, \*\*\*.001

## Interactions

**Table S8.** Associations of dairy product types and prediabetes risk in the Rotterdam Studies, stratified by sex and baseline WC (n=6053).

|                             | Pooled<br>P <sub>interaction</sub> | Strata    | HR (95%CI)        | RS-I<br>HR (95%CI) | RS-II<br>HR (95%CI) | RS-III<br>HR (95%CI) |
|-----------------------------|------------------------------------|-----------|-------------------|--------------------|---------------------|----------------------|
| <i>Interaction with sex</i> |                                    |           |                   |                    |                     |                      |
| High-fat fermented dairy    | 0.04                               | Women     | 1.06 (1.01-1.11)* | 1.06 (0.96-1.18)   | 1.08 (1.02-1.15) *  | 0.85 (0.71-1.02)     |
|                             |                                    | Men       | 1.02 (0.96-1.09)  | 1.10 (1.00-1.21) * | 0.95 (0.86-1.05)    | 1.02 (0.89-1.17)     |
| High-fat cheese             | 0.02                               | Women     | 1.07 (1.02-1.12)* | 1.09 (0.98-1.20)   | 1.08 (1.02-1.15) *  | 0.87 (0.72-1.04)     |
|                             |                                    | Men       | 1.03 (0.97-1.10)  | 1.11 (1.01-1.22) * | 0.95 (0.86-1.05)    | 1.04 (0.91-1.19)     |
| <i>Interaction with WC</i>  |                                    |           |                   |                    |                     |                      |
| Low-fat fermented dairy     | 0.01                               | WC <90 cm | 1.02 (0.93-1.12)  | 1.00 (0.89-1.14)   | 1.15 (0.95-1.39)    | 0.92 (0.73-1.16)     |
|                             |                                    | WC ≥90 cm | 1.01 (0.94-1.09)  | 1.06 (0.94-1.20)   | 0.93 (0.82-1.07)    | 1.04 (0.90-1.19)     |
| Low-fat cheese              | 0.04                               | WC <90 cm | 1.04 (0.90-1.21)  | 1.09 (0.89-1.34)   | 1.10 (0.82-1.48)    | 0.85 (0.60-1.20)     |
|                             |                                    | WC ≥90 cm | 1.09 (0.98-1.21)  | 1.17 (0.96-1.42)   | 0.95 (0.79-1.14)    | 1.16 (0.97-1.38)     |
| Ice cream                   | 0.01                               | WC <90 cm | 0.53 (0.27-1.04)  | 0.37 (0.10-1.41)   | 0.54 (0.17-1.75)    | 0.65 (0.22-1.96)     |
|                             |                                    | WC ≥90 cm | 1.15 (0.83-1.58)  | 1.52 (0.54-4.26)   | 1.09 (0.73-1.63)    | 1.17 (0.62-2.22)     |

Only stratified models for which the interaction term was stat sign (p<0.05) are presented. Models are adjusted for age (continuous), sex, energy intake (continuous), education (3 categories), smoking (3 categories), physical activity (continuous), alcohol consumption (4 categories), family history of diabetes (yes/no, RS-I and RS-II only) and intake of fruits, vegetables, wholegrains, legumes, nuts, tea, coffee, red meat, and sugar-sweetened beverages (SSB) (continuous). HR, Hazard Ratio. P value significance level: \*.05, \*\*.01, \*\*\*.001

**Table S9.** Associations of dairy product types and longitudinal insulin resistance in the Rotterdam Studies, stratified by sex, age and WC (n=6593).

|                                     | Pooled<br>P <sub>interaction</sub> | Strata    | B (95%CI)               | RS-I<br>B (95%CI)   | RS-II<br>B (95%CI)   | RS-III<br>B (95%CI)   |
|-------------------------------------|------------------------------------|-----------|-------------------------|---------------------|----------------------|-----------------------|
| <i>Interaction with sex</i>         |                                    |           |                         |                     |                      |                       |
| Low-fat fermented dairy             | 0.01                               | Women     | -0.01 (-0.03, 0.00)     | -0.01 (-0.03, 0.02) | -0.02 (-0.06, 0.01)  | -0.01 (-0.04, 0.01)   |
|                                     |                                    | Men       | 0.00 (-0.02, 0.02)      | 0.01 (-0.02, 0.05)  | 0.02 (-0.02, 0.07)   | -0.01 (-0.04, 0.01)   |
| Yogurt                              | 0.02                               | Women     | -0.04 (-0.06, -0.01)*** | -0.02 (-0.07, 0.03) | -0.06 (-0.12, 0.01)  | -0.04 (-0.08, -0.01)* |
|                                     |                                    | Men       | -0.02 (-0.05, 0.01)     | 0.03 (-0.04, 0.11)  | 0.09 (0.00, 0.18)    | -0.04 (-0.08, -0.01)* |
| Low-fat yogurt                      | 0.01                               | Women     | -0.03 (-0.05, 0.00)     | 0.01 (-0.05, 0.07)  | -0.05 (-0.12, 0.02)  | -0.03 (-0.07, 0.00)   |
|                                     |                                    | Men       | -0.01 (-0.04, 0.02)     | 0.03 (-0.06, 0.12)  | 0.13 (0.04, 0.23)*   | -0.03 (-0.07, 0.00)   |
| Low-fat cheese                      | 0.05                               | Women     | 0.00 (-0.02, 0.03)      | 0.00 (-0.05, 0.05)  | -0.01 (-0.07, 0.04)  | 0.01 (-0.03, 0.04)    |
|                                     |                                    | Men       | 0.01 (-0.02, 0.04)      | 0.05 (-0.01, 0.11)  | -0.03 (-0.10, 0.05)  | 0.01 (-0.03, 0.04)    |
| Cream                               | 0.03                               | Women     | 0.00 (-0.03, 0.04)      | 0.01 (-0.03, 0.05)  | -0.11 (-0.28, 0.07)  | -0.02 (-0.14, 0.09)   |
|                                     |                                    | Men       | -0.03 (-0.07, 0.01)     | -0.03 (-0.07, 0.02) | -0.17 (-0.37, 0.04)  | -0.02 (-0.14, 0.09)   |
| Ice cream                           | 0.01                               | Women     | 0.07 (0.02, 0.13)**     | 0.03 (-0.21, 0.28)  | 0.09 (0.03, 0.16)*** | 0.00 (-0.13, 0.13)    |
|                                     |                                    | Men       | -0.03 (-0.10, 0.05)     | -0.09 (-0.34, 0.16) | -0.03 (-0.13, 0.06)  | 0.00 (-0.13, 0.13)    |
| <i>Interaction with age</i>         |                                    |           |                         |                     |                      |                       |
| High-fat fermented dairy            | 0.02                               | Age <61   | 0.00 (-0.01, 0.01)      | 0.01 (-0.02, 0.03)  | 0.01 (-0.01, 0.03)   | -0.01 (-0.03, 0.01)   |
|                                     |                                    | Age ≥61   | -0.01 (-0.02, 0.00)     | -0.01 (-0.03, 0.01) | -0.01 (-0.03, 0.01)  | 0.00 (-0.06, 0.05)    |
| Total cheese                        | 0.01                               | Age <61   | 0.01 (0.00, 0.02)       | 0.02 (-0.01, 0.05)  | 0.01 (-0.01, 0.03)   | 0.01 (-0.01, 0.02)    |
|                                     |                                    | Age ≥61   | -0.01 (-0.02, 0.01)     | -0.01 (-0.03, 0.02) | -0.01 (-0.03, 0.01)  | 0.01 (-0.04, 0.06)    |
| High-fat cheese                     | 0.01                               | Age <61   | 0.00 (-0.01, 0.02)      | 0.01 (-0.02, 0.04)  | 0.01 (-0.01, 0.03)   | 0.00 (-0.02, 0.02)    |
|                                     |                                    | Age ≥61   | -0.01 (-0.02, 0.01)     | -0.01 (-0.03, 0.02) | -0.01 (-0.03, 0.01)  | 0.01 (-0.04, 0.06)    |
| <i>Interaction with baseline WC</i> |                                    |           |                         |                     |                      |                       |
| Total dairy                         | 0.01                               | WC <90 cm | 0.00 (-0.01, 0.01)      | -0.02 (-0.04, 0.00) | 0.01 (-0.01, 0.02)   | 0.00 (-0.01, 0.02)    |
|                                     |                                    | WC ≥90 cm | 0.00 (-0.01, 0.01)      | 0.00 (-0.01, 0.02)  | 0.00 (-0.02, 0.02)   | 0.01 (-0.01, 0.02)    |
| Low-fat dairy                       | 0.01                               | WC <90 cm | 0.00 (-0.01, 0.01)      | -0.01 (-0.03, 0.01) | 0.00 (-0.02, 0.03)   | 0.01 (-0.01, 0.03)    |
|                                     |                                    | WC ≥90 cm | 0.01 (0.00, 0.03)       | 0.02 (0.00, 0.04)   | 0.01 (-0.01, 0.04)   | 0.00 (-0.02, 0.03)    |
| Fermented dairy                     | 0.02                               | WC <90 cm | 0.00 (-0.01, 0.01)      | -0.02 (-0.04, 0.00) | 0.00 (-0.01, 0.02)   | 0.00 (-0.02, 0.02)    |
|                                     |                                    | WC ≥90 cm | 0.00 (-0.02, 0.01)      | 0.00 (-0.02, 0.02)  | -0.01 (-0.02, 0.01)  | 0.00 (-0.02, 0.02)    |
| Low-fat fermented dairy             | 0.02                               | WC <90 cm | -0.01 (-0.03, 0.00)     | -0.01 (-0.04, 0.02) | -0.02 (-0.05, 0.01)  | -0.01 (-0.04, 0.01)   |
|                                     |                                    | WC ≥90 cm | 0.00 (-0.02, 0.02)      | 0.01 (-0.02, 0.04)  | -0.01 (-0.04, 0.03)  | -0.01 (-0.04, 0.02)   |
| Total milk                          | 0.01                               | WC <90 cm | 0.00 (-0.02, 0.02)      | -0.01 (-0.04, 0.01) | 0.02 (-0.02, 0.05)   | 0.00 (-0.02, 0.03)    |
|                                     |                                    | WC ≥90 cm | 0.01 (0.00, 0.03)       | 0.01 (-0.02, 0.04)  | 0.03 (0.00, 0.06)    | 0.00 (-0.02, 0.03)    |
| High-fat milk                       | 0.03                               | WC <90 cm | -0.02 (-0.04, 0.00)     | -0.01 (-0.05, 0.04) | -0.08 (-0.17, 0.01)  | -0.02 (-0.05, 0.01)   |
|                                     |                                    | WC ≥90 cm | 0.00 (-0.03, 0.02)      | -0.01 (-0.07, 0.04) | -0.01 (-0.08, 0.06)  | 0.00 (-0.04, 0.04)    |
| Low-fat yogurt                      | 0.03                               | WC <90 cm | -0.02 (-0.05, 0.00)     | 0.00 (-0.07, 0.07)  | -0.07 (-0.14, 0.01)  | -0.02 (-0.06, 0.01)   |
|                                     |                                    | WC ≥90 cm | -0.01 (-0.04, 0.02)     | 0.00 (-0.07, 0.07)  | 0.05 (-0.02, 0.12)   | -0.03 (-0.08, 0.01)   |

Only stratified models for which the interaction term was stat sign (p<0.05) are presented. Models are adjusted for age (continuous), sex, energy intake (continuous), education (3 categories), smoking (3 categories), physical activity (continuous), alcohol consumption (4 categories), family history of diabetes (yes/no, RS-I and RS-II only) and intake of fruits, vegetables, wholegrains, legumes, nuts, tea, coffee, red meat and sugar-sweetened beverages (SSB) (continuous). HR, Hazard Ratio. P value significance level: \*.05, \*\*.01, \*\*\*.001

## Sensitivity analyses

**Table S10.** Sensitivity analyses of associations of dairy product types and prediabetes risk in the Rotterdam Studies (n=6053).

|                                 | Pooled effect estimates<br>n=6053 |                  |                  |                  |                    |                    | RS-I<br>n=2457     | RS-II<br>n=1193   | RS-III<br>n=2139  |
|---------------------------------|-----------------------------------|------------------|------------------|------------------|--------------------|--------------------|--------------------|-------------------|-------------------|
|                                 | Intake range categories           |                  |                  |                  |                    | Continuous         | Continuous         | Continuous        | Continuous        |
|                                 | Q1<br>HR                          | Q2<br>HR (95%CI) | Q3<br>HR (95%CI) | Q4<br>HR (95%CI) | P <sub>trend</sub> | HR (95%CI)         | HR (95%CI)         | HR (95%CI)        | HR (95%CI)        |
| <b>Total dairy</b>              |                                   |                  |                  |                  |                    |                    |                    |                   |                   |
| Main analysis model 2           | 1 (ref)                           | 0.98 (0.83-1.16) | 0.91 (0.76-1.08) | 1.09 (0.91-1.31) | 0.38               | 1.03 (1.00-1.07)   | 1.08 (1.03-1.14)** | 1.03 (0.98-1.08)  | 0.95 (0.88-1.02)  |
| 1. Adjust. longitudinal WC      | 1 (ref)                           | 0.97 (0.75-1.27) | 0.89 (0.73-1.09) | 1.03 (0.85-1.27) | 0.78               | 1.02 (0.97-1.08)   | 1.06 (0.98-1.15)   | 1.03 (0.95-1.11)  | 0.94 (0.83-1.05)  |
| 2. Adjust. CVD risk factors     | 1 (ref)                           | 0.98 (0.83-1.16) | 0.90 (0.76-1.08) | 1.06 (0.88-1.27) | 0.64               | 1.03 (0.99-1.06)   | 1.07 (1.02-1.13)*  | 1.03 (0.98-1.08)  | 0.95 (0.88-1.02)  |
| 3. Adjust. other dairy intake   | 1 (ref)                           | 0.98 (0.83-1.16) | 0.91 (0.76-1.08) | 1.09 (0.91-1.31) | 0.38               | 1.03 (1.00-1.07)   | 1.08 (1.03-1.14)** | 1.03 (0.98-1.08)  | 0.95 (0.88-1.02)  |
| 4. Exclusion CHD                | 1 (ref)                           | 1.02 (0.85-1.22) | 0.91 (0.76-1.10) | 1.09 (0.90-1.33) | 0.45               | 1.03 (1.00-1.07)   | 1.07 (1.01-1.13)*  | 1.04 (0.98-1.09)  | 0.96 (0.89-1.03)  |
| 5. Energy adjusted dairy        | 1 (ref)                           | 1.17 (0.99-1.37) | 1.03 (0.87-1.22) | 1.04 (0.87-1.23) | 0.95               | 1.01 (0.96-1.06)   | 1.05 (0.97-1.13)   | 1.05 (0.96-1.16)  | 0.90 (0.82-1.00)  |
| <b>High-fat dairy</b>           |                                   |                  |                  |                  |                    |                    |                    |                   |                   |
| Main analysis model 2           | 1 (ref)                           | 1.11 (0.94-1.31) | 0.97 (0.82-1.15) | 0.94 (0.78-1.13) | 0.22               | 1.00 (0.96-1.04)   | 1.04 (0.98-1.12)   | 1.00 (0.95-1.06)  | 0.92 (0.84-1.01)  |
| 1. Adjust. longitudinal WC      | 1 (ref)                           | 1.10 (0.84-1.43) | 0.97 (0.79-1.18) | 0.96 (0.78-1.17) | 0.55               | 1.00 (0.94-1.06)   | 1.03 (0.93-1.14)   | 1.00 (0.91-1.09)  | 0.94 (0.81-1.07)  |
| 2. Adjust. CVD risk factors     | 1 (ref)                           | 1.12 (0.95-1.32) | 1.01 (0.85-1.19) | 0.95 (0.78-1.14) | 0.25               | 1.00 (0.96-1.04)   | 1.04 (0.98-1.11)   | 1.00 (0.95-1.06)  | 0.93 (0.85-1.02)  |
| 3. Adjust. other dairy intake   | 1 (ref)                           | 1.14 (0.97-1.35) | 1.01 (0.85-1.19) | 0.99 (0.82-1.20) | 0.49               | 1.02 (0.98-1.06)   | 1.07 (1.00-1.14)   | 1.01 (0.96-1.08)  | 0.92 (0.84-1.01)  |
| 4. Exclusion CHD                | 1 (ref)                           | 1.15 (0.97-1.38) | 0.98 (0.82-1.18) | 0.98 (0.81-1.19) | 0.35               | 1.00 (0.96-1.05)   | 1.03 (0.96-1.11)   | 1.01 (0.96-1.07)  | 0.95 (0.87-1.04)  |
| 5. Energy adjusted dairy        | 1 (ref)                           | 0.96 (0.81-1.13) | 0.97 (0.82-1.16) | 0.78 (0.66-0.94) | 0.01               | 0.86 (0.77-0.95)** | 0.92 (0.81-1.06)   | 0.69 (0.52-0.92)* | 0.82 (0.68-0.98)* |
| <b>Low-fat dairy</b>            |                                   |                  |                  |                  |                    |                    |                    |                   |                   |
| Main analysis model 2           | 1 (ref)                           | 1.08 (0.92-1.28) | 1.10 (0.93-1.31) | 1.17 (0.99-1.39) | 0.06               | 1.05 (1.01-1.10)*  | 1.07 (1.01-1.14)*  | 1.06 (0.99-1.14)  | 1.00 (0.91-1.10)  |
| 1. Adjust. longitudinal WC      | 1 (ref)                           | 1.04 (0.79-1.36) | 1.04 (0.85-1.27) | 1.08 (0.89-1.31) | 0.55               | 1.03 (0.96-1.11)   | 1.06 (0.95-1.17)   | 1.05 (0.92-1.19)  | 0.96 (0.81-1.12)  |
| 2. Adjust. CVD risk factors     | 1 (ref)                           | 1.07 (0.91-1.27) | 1.04 (0.87-1.23) | 1.14 (0.96-1.35) | 0.15               | 1.04 (1.00-1.09)*  | 1.06 (1.00-1.13)   | 1.06 (0.98-1.13)  | 0.99 (0.90-1.09)  |
| 3. Adjust. other dairy intake   | 1 (ref)                           | 1.09 (0.92-1.29) | 1.11 (0.94-1.32) | 1.19 (1.00-1.42) | 0.04               | 1.06 (1.01-1.11)** | 1.09 (1.02-1.16)*  | 1.07 (0.99-1.15)  | 0.98 (0.89-1.08)  |
| 4. Exclusion CHD                | 1 (ref)                           | 1.07 (0.89-1.28) | 1.11 (0.93-1.33) | 1.17 (0.98-1.41) | 0.06               | 1.05 (1.00-1.10)*  | 1.07 (1.00-1.15)   | 1.06 (0.98-1.14)  | 0.99 (0.89-1.09)  |
| 5. Energy adjusted dairy        | 1 (ref)                           | 1.18 (1.00-1.39) | 1.14 (0.96-1.36) | 1.16 (0.98-1.38) | 0.09               | 1.06 (1.01-1.12)*  | 1.07 (1.00-1.15)   | 1.11 (1.01-1.21)* | 0.97 (0.86-1.09)  |
| <b>Total fermented dairy</b>    |                                   |                  |                  |                  |                    |                    |                    |                   |                   |
| Main analysis model 2           | 1 (ref)                           | 0.98 (0.83-1.15) | 0.95 (0.80-1.13) | 1.00 (0.84-1.19) | 0.94               | 1.03 (0.99-1.06)   | 1.06 (1.00-1.12)   | 1.02 (0.97-1.07)  | 0.97 (0.89-1.06)  |
| 1. Adjust. longitudinal WC      | 1 (ref)                           | 0.94 (0.72-1.23) | 0.94 (0.77-1.15) | 0.97 (0.80-1.18) | 0.99               | 1.02 (0.96-1.08)   | 1.05 (0.95-1.15)   | 1.02 (0.93-1.10)  | 0.96 (0.83-1.10)  |
| 2. Adjust. CVD risk factors     | 1 (ref)                           | 0.99 (0.84-1.17) | 0.94 (0.79-1.12) | 0.98 (0.82-1.17) | 0.81               | 1.02 (0.99-1.06)   | 1.05 (0.99-1.11)   | 1.02 (0.96-1.07)  | 0.97 (0.89-1.06)  |
| 3. Adjust. other dairy intake   | 1 (ref)                           | 0.98 (0.83-1.16) | 0.96 (0.81-1.14) | 1.02 (0.85-1.22) | 0.76               | 1.03 (1.00-1.07)   | 1.07 (1.01-1.14)*  | 1.03 (0.97-1.08)  | 0.97 (0.89-1.05)  |
| 4. Exclusion CHD                | 1 (ref)                           | 0.99 (0.83-1.18) | 0.98 (0.82-1.18) | 0.99 (0.82-1.19) | 1.00               | 1.02 (0.99-1.06)   | 1.05 (0.99-1.12)   | 1.02 (0.97-1.07)  | 0.98 (0.89-1.07)  |
| 5. Energy adjusted dairy        | 1 (ref)                           | 0.90 (0.77-1.06) | 0.96 (0.82-1.14) | 0.85 (0.71-1.01) | 0.13               | 0.97 (0.90-1.05)   | 0.98 (0.88-1.09)   | 1.00 (0.87-1.16)  | 0.89 (0.75-1.06)  |
| <b>High-fat fermented dairy</b> |                                   |                  |                  |                  |                    |                    |                    |                   |                   |
| Main analysis model 2           | 1 (ref)                           | 0.99 (0.83-1.16) | 0.94 (0.80-1.11) | 0.93 (0.78-1.11) | 0.41               | 1.03 (0.99-1.07)   | 1.07 (1.00-1.15)   | 1.02 (0.96-1.07)  | 0.95 (0.86-1.06)  |
| 1. Adjust. longitudinal WC      | 1 (ref)                           | 0.98 (0.75-1.29) | 0.93 (0.76-1.13) | 0.95 (0.78-1.15) | 0.72               | 1.02 (0.96-1.09)   | 1.05 (0.93-1.17)   | 1.02 (0.93-1.10)  | 0.96 (0.81-1.13)  |
| 2. Adjust. CVD risk factors     | 1 (ref)                           | 0.99 (0.84-1.17) | 0.97 (0.82-1.15) | 0.93 (0.78-1.11) | 0.36               | 1.02 (0.99-1.07)   | 1.06 (1.00-1.14)*  | 1.02 (0.96-1.08)  | 0.96 (0.86-1.06)  |
| 3. Adjust. other dairy intake   | 1 (ref)                           | 1.00 (0.84-1.18) | 0.95 (0.81-1.13) | 0.95 (0.79-1.14) | 0.54               | 1.03 (0.99-1.08)   | 1.09 (1.02-1.16)   | 1.03 (0.97-1.08)  | 0.94 (0.85-1.05)  |
| 4. Exclusion CHD                | 1 (ref)                           | 1.02 (0.85-1.22) | 0.95 (0.79-1.13) | 0.93 (0.77-1.12) | 0.31               | 1.03 (0.99-1.07)   | 1.05 (0.97-1.13)   | 1.03 (0.97-1.08)  | 0.98 (0.89-1.09)  |
| 5. Energy adjusted dairy        | 1 (ref)                           | 1.01 (0.85-1.19) | 1.01 (0.85-1.19) | 0.89 (0.75-1.05) | 0.13               | 0.83 (0.65-1.07)   | 0.93 (0.65-1.31)   | 0.87 (0.54-1.40)  | 0.57 (0.32-1.03)  |
| <b>Low-fat fermented dairy</b>  |                                   |                  |                  |                  |                    |                    |                    |                   |                   |
| Main analysis model 2           | 1 (ref)                           | 0.98 (0.83-1.16) | 0.93 (0.79-1.11) | 1.01 (0.85-1.19) | 0.85               | 1.01 (0.96-1.07)   | 1.03 (0.94-1.12)   | 1.01 (0.91-1.11)  | 1.01 (0.90-1.13)  |
| 1. Adjust. longitudinal WC      | 1 (ref)                           | 0.98 (0.75-1.28) | 0.90 (0.74-1.10) | 0.96 (0.79-1.16) | 0.81               | 1.00 (0.91-1.10)   | 1.02 (0.88-1.18)   | 1.00 (0.83-1.19)  | 0.97 (0.79-1.16)  |
| 2. Adjust. CVD risk factors     | 1 (ref)                           | 0.96 (0.82-1.13) | 0.92 (0.77-1.09) | 0.98 (0.83-1.17) | 0.99               | 1.01 (0.95-1.06)   | 1.01 (0.93-1.10)   | 1.00 (0.91-1.10)  | 1.01 (0.90-1.13)  |
| 3. Adjust. other dairy intake   | 1 (ref)                           | 0.97 (0.82-1.14) | 0.92 (0.78-1.10) | 1.02 (0.86-1.21) | 0.68               | 1.02 (0.97-1.08)   | 1.05 (0.96-1.15)   | 1.02 (0.92-1.12)  | 0.99 (0.88-1.11)  |
| 4. Exclusion CHD                | 1 (ref)                           | 1.01 (0.85-1.21) | 0.96 (0.80-1.15) | 1.01 (0.84-1.22) | 0.97               | 1.01 (0.95-1.07)   | 1.04 (0.95-1.14)   | 1.00 (0.90-1.10)  | 0.98 (0.87-1.10)  |
| 5. Energy adjusted dairy        | 1 (ref)                           | 0.96 (0.81-1.13) | 1.04 (0.89-1.23) | 0.92 (0.77-1.09) | 0.41               | 0.99 (0.91-1.07)   | 0.99 (0.88-1.11)   | 1.02 (0.88-1.18)  | 0.95 (0.80-1.12)  |
| <b>Total milk</b>               |                                   |                  |                  |                  |                    |                    |                    |                   |                   |
| Main analysis model 2           | 1 (ref)                           | 1.13 (0.95-1.33) | 1.09 (0.92-1.30) | 1.09 (0.92-1.29) | 0.31               | 1.02 (0.97-1.08)   | 1.06 (0.99-1.15)   | 1.05 (0.95-1.16)  | 0.92 (0.82-1.03)  |
| 1. Adjust. longitudinal WC      | 1 (ref)                           | 1.08 (0.83-1.41) | 1.08 (0.89-1.32) | 1.03 (0.85-1.25) | 0.77               | 1.00 (0.91-1.10)   | 1.05 (0.92-1.20)   | 1.01 (0.85-1.19)  | 0.89 (0.72-1.06)  |

|                               |         |                  |                  |                  |       |                    |                     |                   |                  |
|-------------------------------|---------|------------------|------------------|------------------|-------|--------------------|---------------------|-------------------|------------------|
| 2. Adjust. CVD risk factors   | 1 (ref) | 1.15 (0.97-1.35) | 1.09 (0.92-1.29) | 1.09 (0.92-1.29) | 0.33  | 1.02 (0.97-1.08)   | 1.06 (0.98-1.15)    | 1.06 (0.95-1.18)  | 0.91 (0.82-1.02) |
| 3. Adjust. other dairy intake | 1 (ref) | 1.13 (0.96-1.33) | 1.10 (0.92-1.30) | 1.10 (0.92-1.30) | 0.28  | 1.03 (0.97-1.09)   | 1.07 (0.99-1.15)    | 1.06 (0.95-1.18)  | 0.92 (0.82-1.03) |
| 4. Exclusion CHD              | 1 (ref) | 1.14 (0.96-1.36) | 1.11 (0.93-1.34) | 1.11 (0.93-1.34) | 0.23  | 1.02 (0.96-1.08)   | 1.06 (0.97-1.16)    | 1.06 (0.95-1.17)  | 0.92 (0.82-1.04) |
| 5. Energy adjusted dairy      | 1 (ref) | 1.18 (1.00-1.39) | 1.04 (0.88-1.24) | 1.07 (0.90-1.27) | 0.68  | 1.03 (0.97-1.09)   | 1.07 (0.99-1.15)    | 1.05 (0.95-1.17)  | 0.92 (0.82-1.03) |
| <b>High-fat milk</b>          |         |                  |                  |                  |       |                    |                     |                   |                  |
| Main analysis model 2         | 1 (ref) | 0.94 (0.78-1.13) | 1.03 (0.88-1.21) | 0.81 (0.67-0.97) | 0.04  | 0.88 (0.79-0.99)*  | 0.95 (0.81-1.10)    | 0.62 (0.43-0.91)* | 0.86 (0.72-1.04) |
| 1. Adjust. longitudinal WC    | 1 (ref) | 0.94 (0.68-1.30) | 1.05 (0.88-1.25) | 0.83 (0.69-1.00) | 0.28  | 0.87 (0.71-1.05)   | 0.95 (0.72-1.20)    | 0.56 (0.28-1.02)  | 0.84 (0.60-1.12) |
| 2. Adjust. CVD risk factors   | 1 (ref) | 0.94 (0.78-1.13) | 1.05 (0.90-1.23) | 0.83 (0.69-1.00) | 0.12  | 0.90 (0.80-1.00)   | 0.95 (0.82-1.11)    | 0.61 (0.41-0.89)* | 0.89 (0.75-1.07) |
| 3. Adjust. other dairy intake | 1 (ref) | 0.95 (0.79-1.15) | 1.06 (0.90-1.24) | 0.86 (0.71-1.03) | 0.14  | 0.91 (0.82-1.02)   | 1.01 (0.86-1.18)    | 0.65 (0.44-0.94)* | 0.86 (0.72-1.04) |
| 4. Exclusion CHD              | 1 (ref) | 0.92 (0.76-1.13) | 1.01 (0.85-1.20) | 0.82 (0.68-1.00) | 0.09  | 0.89 (0.79-1.00)   | 0.95 (0.81-1.12)    | 0.69 (0.48-1.00)  | 0.88 (0.73-1.06) |
| 5. Energy adjusted dairy      | 1 (ref) | 0.95 (0.80-1.14) | 1.00 (0.84-1.19) | 0.84 (0.69-1.01) | 0.12  | 0.89 (0.80-0.99)*  | 0.95 (0.81-1.10)    | 0.72 (0.52-1.00)  | 0.87 (0.72-1.05) |
| <b>Low-fat milk</b>           |         |                  |                  |                  |       |                    |                     |                   |                  |
| Main analysis model 2         | 1 (ref) | 1.19 (1.01-1.41) | 1.20 (1.02-1.43) | 1.14 (0.96-1.36) | 0.20  | 1.07 (1.01-1.13)*  | 1.08 (1.00-1.16)*   | 1.11 (1.00-1.23)* | 0.96 (0.84-1.11) |
| 1. Adjust. longitudinal WC    | 1 (ref) | 1.15 (0.88-1.51) | 1.16 (0.95-1.41) | 1.06 (0.87-1.28) | 0.79  | 1.04 (0.94-1.14)   | 1.06 (0.93-1.20)    | 1.06 (0.90-1.25)  | 0.90 (0.69-1.14) |
| 2. Adjust. CVD risk factors   | 1 (ref) | 1.18 (1.00-1.40) | 1.18 (0.99-1.39) | 1.12 (0.95-1.34) | 0.26  | 1.07 (1.01-1.13)*  | 1.08 (1.00-1.16)    | 1.12 (1.01-1.24)* | 0.93 (0.80-1.08) |
| 3. Adjust. other dairy intake | 1 (ref) | 1.20 (1.02-1.42) | 1.21 (1.03-1.44) | 1.16 (0.97-1.37) | 0.16  | 1.08 (1.02-1.14)*  | 1.09 (1.01-1.17)*   | 1.11 (1.01-1.23)* | 0.96 (0.83-1.11) |
| 4. Exclusion CHD              | 1 (ref) | 1.19 (0.99-1.42) | 1.17 (0.98-1.41) | 1.16 (0.96-1.39) | 0.17  | 1.06 (1.00-1.13)*  | 1.07 (0.99-1.17)    | 1.10 (1.00-1.22)  | 0.96 (0.83-1.11) |
| 5. Energy adjusted dairy      | 1 (ref) | 1.11 (0.94-1.32) | 1.13 (0.96-1.34) | 1.13 (0.96-1.34) | 0.10  | 1.07 (1.01-1.13)*  | 1.08 (1.00-1.16)    | 1.11 (1.01-1.23)* | 0.96 (0.83-1.11) |
| <b>Total yogurt</b>           |         |                  |                  |                  |       |                    |                     |                   |                  |
| Main analysis model 2         | 1 (ref) | 0.92 (0.79-1.08) | 1.00 (0.84-1.19) | 0.84 (0.71-0.99) | 0.05  | 0.92 (0.82-1.02)   | 0.89 (0.73-1.07)    | 0.95 (0.76-1.20)  | 0.92 (0.77-1.09) |
| 1. Adjust. longitudinal WC    | 1 (ref) | 0.90 (0.69-1.16) | 1.01 (0.83-1.24) | 0.85 (0.71-1.03) | 0.35  | 0.92 (0.76-1.11)   | 0.88 (0.63-1.20)    | 0.93 (0.63-1.33)  | 0.95 (0.69-1.25) |
| 2. Adjust. CVD risk factors   | 1 (ref) | 0.90 (0.77-1.06) | 0.99 (0.83-1.18) | 0.85 (0.71-1.01) | 0.07  | 0.92 (0.83-1.03)   | 0.90 (0.74-1.08)    | 0.95 (0.76-1.20)  | 0.93 (0.78-1.11) |
| 3. Adjust. other dairy intake | 1 (ref) | 0.92 (0.79-1.08) | 0.99 (0.83-1.18) | 0.84 (0.71-1.00) | 0.05  | 0.92 (0.82-1.03)   | 0.91 (0.75-1.10)    | 0.96 (0.76-1.21)  | 0.90 (0.76-1.07) |
| 4. Exclusion CHD              | 1 (ref) | 0.98 (0.83-1.16) | 1.02 (0.85-1.23) | 0.88 (0.73-1.05) | 0.12  | 0.93 (0.82-1.04)   | 0.90 (0.73-1.10)    | 0.99 (0.78-1.25)  | 0.91 (0.77-1.09) |
| 5. Energy adjusted dairy      | 1 (ref) | 0.90 (0.76-1.06) | 0.98 (0.83-1.16) | 0.87 (0.73-1.03) | 0.10  | 0.91 (0.82-1.02)   | 0.88 (0.73-1.07)    | 0.95 (0.75-1.20)  | 0.92 (0.78-1.09) |
| <b>High-fat yogurt</b>        |         |                  |                  |                  |       |                    |                     |                   |                  |
| Main analysis model 2         | 1 (ref) | 0.70 (0.54-0.89) | 1.04 (0.84-1.28) | 0.70 (0.54-0.91) | 0.005 | 0.67 (0.51-0.89)** | 0.76 (0.54-1.07)    | 0.47 (0.20-1.10)  | 0.55 (0.29-1.04) |
| 1. Adjust. longitudinal WC    | 1 (ref) | 0.67 (0.43-1.05) | 1.04 (0.83-1.31) | 0.73 (0.56-0.95) | 0.12  | 0.65 (0.40-1.05)   | 0.74 (0.40-1.24)    | 0.40 (0.07-1.45)  | 0.52 (0.15-1.29) |
| 2. Adjust. CVD risk factors   | 1 (ref) | 0.69 (0.54-0.89) | 1.02 (0.82-1.26) | 0.75 (0.58-0.98) | 0.02  | 0.72 (0.55-0.96)*  | 0.81 (0.58-1.13)    | 0.49 (0.20-1.16)  | 0.58 (0.30-1.10) |
| 3. Adjust. other dairy intake | 1 (ref) | 0.71 (0.55-0.90) | 1.05 (0.85-1.30) | 0.72 (0.55-0.94) | 0.01  | 0.70 (0.53-0.93)*  | 0.81 (0.57-1.14)    | 0.49 (0.21-1.14)  | 0.53 (0.28-1.01) |
| 4. Exclusion CHD              | 1 (ref) | 0.75 (0.58-0.97) | 1.01 (0.81-1.24) | 0.70 (0.51-0.96) | 0.03  | 0.72 (0.54-0.96)*  | 0.81 (0.57-1.16)    | 0.51 (0.21-1.22)  | 0.57 (0.31-1.07) |
| 5. Energy adjusted dairy      | 1 (ref) | 0.72 (0.56-0.93) | 1.02 (0.82-1.26) | 0.74 (0.58-0.95) | 0.010 | 0.67 (0.50-0.89)** | 0.75 (0.53-1.06)    | 0.47 (0.20-1.10)  | 0.54 (0.28-1.03) |
| <b>Low-fat yogurt</b>         |         |                  |                  |                  |       |                    |                     |                   |                  |
| Main analysis model 2         | 1 (ref) | 1.10 (0.93-1.28) | 1.10 (0.92-1.31) | 0.99 (0.83-1.17) | 0.54  | 0.99 (0.88-1.11)   | 0.97 (0.78-1.21)    | 1.03 (0.82-1.29)  | 0.98 (0.83-1.16) |
| 1. Adjust. longitudinal WC    | 1 (ref) | 1.08 (0.83-1.41) | 1.09 (0.89-1.32) | 0.98 (0.82-1.18) | 0.73  | 0.98 (0.80-1.19)   | 0.95 (0.64-1.36)    | 0.99 (0.67-1.40)  | 0.99 (0.73-1.30) |
| 2. Adjust. CVD risk factors   | 1 (ref) | 1.09 (0.93-1.28) | 1.08 (0.91-1.28) | 0.98 (0.83-1.17) | 0.48  | 0.98 (0.88-1.10)   | 0.95 (0.76-1.19)    | 1.02 (0.82-1.27)  | 0.98 (0.83-1.16) |
| 3. Adjust. other dairy intake | 1 (ref) | 1.09 (0.93-1.27) | 1.09 (0.92-1.30) | 0.98 (0.83-1.17) | 0.49  | 0.98 (0.88-1.10)   | 0.98 (0.79-1.22)    | 1.04 (0.83-1.30)  | 0.96 (0.81-1.13) |
| 4. Exclusion CHD              | 1 (ref) | 1.13 (0.96-1.34) | 1.11 (0.92-1.33) | 1.02 (0.85-1.22) | 0.68  | 0.99 (0.88-1.12)   | 0.96 (0.75-1.22)    | 1.06 (0.84-1.34)  | 0.97 (0.82-1.15) |
| 5. Energy adjusted dairy      | 1 (ref) | 1.05 (0.90-1.24) | 1.07 (0.91-1.26) | 0.99 (0.83-1.17) | 0.69  | 0.99 (0.88-1.11)   | 0.97 (0.78-1.20)    | 1.03 (0.82-1.28)  | 0.98 (0.83-1.16) |
| <b>Total cheese</b>           |         |                  |                  |                  |       |                    |                     |                   |                  |
| Main analysis model 2         | 1 (ref) | 1.04 (0.88-1.23) | 0.98 (0.83-1.17) | 1.11 (0.94-1.33) | 0.32  | 1.05 (1.01-1.09)** | 1.11 (1.04-1.19)**  | 1.02 (0.97-1.08)  | 1.00 (0.91-1.10) |
| 1. Adjust. longitudinal WC    | 1 (ref) | 0.99 (0.75-1.29) | 0.93 (0.76-1.14) | 1.06 (0.87-1.29) | 0.69  | 1.03 (0.97-1.10)   | 1.08 (0.97-1.20)    | 1.02 (0.93-1.11)  | 0.98 (0.83-1.14) |
| 2. Adjust. CVD risk factors   | 1 (ref) | 1.05 (0.89-1.25) | 1.00 (0.84-1.19) | 1.09 (0.91-1.30) | 0.52  | 1.04 (1.00-1.08)   | 1.09 (1.02-1.17)*   | 1.02 (0.96-1.07)  | 1.00 (0.91-1.10) |
| 3. Adjust. other dairy intake | 1 (ref) | 1.04 (0.88-1.23) | 0.98 (0.83-1.17) | 1.11 (0.94-1.33) | 0.31  | 1.05 (1.01-1.09)*  | 1.12 (1.04-1.19)**  | 1.03 (0.97-1.08)  | 0.99 (0.90-1.09) |
| 4. Exclusion CHD              | 1 (ref) | 1.04 (0.87-1.24) | 1.00 (0.83-1.20) | 1.08 (0.90-1.30) | 0.51  | 1.04 (1.00-1.08)*  | 1.09 (1.02-1.18)*   | 1.02 (0.97-1.08)  | 1.01 (0.92-1.11) |
| 5. Energy adjusted dairy      | 1 (ref) | 1.00 (0.84-1.19) | 1.02 (0.86-1.21) | 1.11 (0.93-1.31) | 0.25  | 1.05 (1.01-1.09)*  | 1.11 (1.04-1.19)*** | 1.02 (0.97-1.08)  | 1.00 (0.91-1.10) |
| <b>High-fat cheese</b>        |         |                  |                  |                  |       |                    |                     |                   |                  |
| Main analysis model 2         | 1 (ref) | 1.05 (0.89-1.24) | 1.03 (0.87-1.21) | 1.05 (0.88-1.25) | 0.75  | 1.03 (1.00-1.08)   | 1.08 (1.01-1.16)*   | 1.02 (0.97-1.08)  | 0.97 (0.87-1.08) |
| 1. Adjust. longitudinal WC    | 1 (ref) | 1.04 (0.79-1.36) | 1.00 (0.82-1.22) | 1.05 (0.86-1.27) | 0.83  | 1.01 (0.96-1.06)   | 1.06 (0.94-1.17)*   | 1.02 (0.93-1.10)  | 0.97 (0.93-1.14) |
| 2. Adjust. CVD risk factors   | 1 (ref) | 1.05 (0.89-1.25) | 1.04 (0.88-1.24) | 1.03 (0.86-1.23) | 0.89  | 1.03 (0.99-1.07)   | 1.07 (1.00-1.15)*   | 1.02 (0.97-1.08)  | 0.97 (0.87-1.08) |
| 3. Adjust. other dairy intake | 1 (ref) | 1.06 (0.90-1.26) | 1.04 (0.88-1.23) | 1.06 (0.89-1.27) | 0.63  | 1.04 (1.00-1.08)*  | 1.10 (1.03-1.17)*   | 1.03 (0.97-1.09)  | 0.96 (0.86-1.07) |
| 4. Exclusion CHD              | 1 (ref) | 1.07 (0.89-1.28) | 1.03 (0.86-1.23) | 1.03 (0.85-1.24) | 0.99  | 1.03 (0.99-1.08)   | 1.06 (0.98-1.14)    | 1.03 (0.97-1.09)  | 1.00 (0.90-1.11) |
| 5. Energy adjusted dairy      | 1 (ref) | 1.05 (0.88-1.24) | 1.00 (0.85-1.19) | 1.06 (0.90-1.26) | 0.51  | 1.04 (1.00-1.08)   | 1.08 (1.01-1.16)*   | 1.02 (0.97-1.08)  | 0.98 (0.88-1.09) |

**Low-fat cheese**

|                               |         |                         |                         |                         |             |                  |                  |                  |                  |
|-------------------------------|---------|-------------------------|-------------------------|-------------------------|-------------|------------------|------------------|------------------|------------------|
| Main analysis model 2         | 1 (ref) | 1.10 (0.90-1.36)        | 1.16 (0.93-1.45)        | 1.17 (0.95-1.44)        | 0.04        | 1.06 (0.97-1.14) | 1.11 (0.97-1.27) | 1.00 (0.88-1.14) | 1.07 (0.92-1.24) |
| 1. Adjust. longitudinal WC    | 1 (ref) | 1.05 (0.73-1.50)        | 1.03 (0.81-1.32)        | 1.07 (0.86-1.32)        | 0.44        | 1.02 (0.88-1.19) | 1.08 (0.85-1.34) | 0.99 (0.73-1.32) | 0.98 (0.74-1.24) |
| 2. Adjust. CVD risk factors   | 1 (ref) | 1.08 (0.88-1.34)        | 1.11 (0.89-1.38)        | 1.12 (0.91-1.39)        | 0.12        | 1.03 (0.95-1.12) | 1.07 (0.93-1.23) | 0.98 (0.86-1.12) | 1.06 (0.91-1.24) |
| 3. Adjust. other dairy intake | 1 (ref) | <b>1.13 (0.91-1.39)</b> | <b>1.18 (0.94-1.47)</b> | <b>1.19 (0.96-1.47)</b> | <b>0.02</b> | 1.07 (0.99-1.16) | 1.15 (1.00-1.33) | 1.01 (0.89-1.16) | 1.05 (0.90-1.22) |
| 4. Exclusion CHD              | 1 (ref) | 1.09 (0.88-1.36)        | 1.14 (0.90-1.44)        | 1.14 (0.91-1.42)        | 0.09        | 1.05 (0.96-1.14) | 1.14 (0.98-1.33) | 0.99 (0.86-1.13) | 1.03 (0.88-1.22) |
| 5. Energy adjusted dairy      | 1 (ref) | 1.06 (0.86-1.32)        | 1.23 (1.00-1.52)        | 1.13 (0.91-1.40)        | 0.05        | 1.06 (0.98-1.14) | 1.11 (0.97-1.27) | 1.00 (0.88-1.14) | 1.07 (0.92-1.24) |

**Cream**

|                               |         |                  |                  |                  |      |                  |                  |                  |                  |
|-------------------------------|---------|------------------|------------------|------------------|------|------------------|------------------|------------------|------------------|
| Main analysis model 2         | 1 (ref) | 0.90 (0.74-1.10) | 0.89 (0.72-1.09) | 1.00 (0.82-1.22) | 0.52 | 1.03 (0.92-1.16) | 1.05 (0.93-1.18) | 0.89 (0.50-1.59) | 0.92 (0.59-1.42) |
| 1. Adjust. longitudinal WC    | 1 (ref) | 0.90 (0.66-1.24) | 0.94 (0.75-1.17) | 1.03 (0.85-1.26) | 0.65 | 1.02 (0.84-1.25) | 1.04 (0.84-1.26) | 0.88 (0.34-1.90) | 0.91 (0.41-1.80) |
| 2. Adjust. CVD risk factors   | 1 (ref) | 0.91 (0.75-1.10) | 0.90 (0.73-1.10) | 1.03 (0.84-1.26) | 0.45 | 1.04 (0.93-1.16) | 1.05 (0.93-1.18) | 0.92 (0.51-1.65) | 0.97 (0.63-1.49) |
| 3. Adjust. other dairy intake | 1 (ref) | 0.90 (0.74-1.10) | 0.91 (0.74-1.12) | 1.04 (0.85-1.28) | 0.17 | 1.09 (0.97-1.22) | 1.11 (0.98-1.26) | 0.93 (0.52-1.67) | 0.86 (0.55-1.35) |
| 4. Exclusion CHD              | 1 (ref) | 0.93 (0.76-1.14) | 0.90 (0.73-1.11) | 0.96 (0.78-1.19) | 0.58 | 1.02 (0.91-1.16) | 1.05 (0.92-1.19) | 0.69 (0.33-1.42) | 0.90 (0.57-1.42) |
| 5. Energy adjusted dairy      | 1 (ref) | 0.88 (0.72-1.08) | 0.94 (0.77-1.15) | 0.96 (0.79-1.18) | 0.58 | 1.03 (0.92-1.16) | 1.05 (0.93-1.18) | 0.90 (0.50-1.60) | 0.90 (0.58-1.39) |

**Ice cream**

|                               |         |                  |                  |                  |      |                  |                  |                  |                  |
|-------------------------------|---------|------------------|------------------|------------------|------|------------------|------------------|------------------|------------------|
| Main analysis model 2         | 1 (ref) | 0.93 (0.77-1.12) | 0.86 (0.70-1.05) | 0.93 (0.78-1.11) | 0.50 | 0.94 (0.70-1.26) | 0.75 (0.34-1.65) | 0.96 (0.65-1.43) | 1.00 (0.58-1.73) |
| 1. Adjust. longitudinal WC    | 1 (ref) | 0.87 (0.62-1.20) | 0.84 (0.66-1.05) | 0.90 (0.76-1.08) | 0.57 | 0.85 (0.51-1.42) | 0.60 (0.13-2.22) | 0.85 (0.40-1.52) | 0.98 (0.36-2.32) |
| 2. Adjust. CVD risk factors   | 1 (ref) | 0.92 (0.76-1.11) | 0.88 (0.71-1.08) | 0.95 (0.80-1.13) | 0.68 | 0.98 (0.74-1.31) | 0.78 (0.35-1.73) | 1.01 (0.69-1.49) | 1.02 (0.60-1.73) |
| 3. Adjust. other dairy intake | 1 (ref) | 0.93 (0.77-1.12) | 0.87 (0.71-1.06) | 0.95 (0.80-1.13) | 0.61 | 0.97 (0.72-1.31) | 0.89 (0.40-1.98) | 1.01 (0.67-1.50) | 0.94 (0.54-1.63) |
| 4. Exclusion CHD              | 1 (ref) | 0.95 (0.78-1.15) | 0.89 (0.72-1.11) | 0.97 (0.81-1.17) | 0.76 | 0.91 (0.66-1.25) | 0.86 (0.37-2.02) | 0.86 (0.54-1.35) | 1.01 (0.59-1.73) |
| 5. Energy adjusted dairy      | 1 (ref) | 0.91 (0.76-1.09) | 0.85 (0.70-1.04) | 0.93 (0.78-1.13) | 0.37 | 0.93 (0.70-1.25) | 0.73 (0.34-1.56) | 0.95 (0.63-1.41) | 1.03 (0.60-1.77) |

Model 2 included age (continuous), sex and energy intake (continuous), education (3 categories), smoking (3 categories), physical activity (continuous), alcohol consumption (4 categories), family history of diabetes (yes/no, RS-I and RS-II only) and intakes of fruit, vegetables, wholegrains, legumes, nuts, tea, coffee, red meat and sugar-sweetened beverages (continuous). CVD, Cardiovascular Disease; CHD, Coronary Heart Disease; HR, Hazard Ratio; WC, waist circumference. P value significance level: \*.05, \*\*.01, \*\*\*.001

**Table S11.** Sensitivity analyses of associations of dairy product types and longitudinal insulin resistance in the Rotterdam Studies (*n*=6593).

|                                 | Pooled effect estimates<br>n=6593 |                    |                    |                     |                    | Continuous            | RS-I<br>n=2892     | RS-II<br>n=1391    | RS-III<br>n=2310      |
|---------------------------------|-----------------------------------|--------------------|--------------------|---------------------|--------------------|-----------------------|--------------------|--------------------|-----------------------|
|                                 | Intake range categories           |                    |                    |                     | Continuous         |                       | Continuous         | Continuous         | Continuous            |
|                                 | Q1<br>B                           | Q2<br>B (95%CI)    | Q3<br>B (95%CI)    | Q4<br>B (95%CI)     | P <sub>trend</sub> |                       | B (95%CI)          | B (95%CI)          | B (95%CI)             |
| <b>Total dairy</b>              |                                   |                    |                    |                     |                    |                       |                    |                    |                       |
| Main analysis model 2           | ref                               | 0.02 (-0.02,0.05)  | 0.00 (-0.04,0.04)  | 0.04 (0.00,0.08)    | 0.07               | 0.00 (0.00,0.01)      | 0.00 (-0.01,0.02)  | 0.01 (-0.01,0.02)  | 0.00 (-0.01,0.01)     |
| 1. Adjust. longitudinal WC      | ref                               | 0.01 (-0.03,0.04)  | -0.01 (-0.05,0.02) | 0.01 (-0.03,0.04)   | 0.81               | 0.00 (-0.01,0.00)     | -0.01 (-0.02,0.00) | 0.00 (-0.01,0.01)  | 0.00 (-0.01,0.01)     |
| 2. Adjust. CVD risk factors     | ref                               | 0.02 (-0.02,0.05)  | 0.00 (-0.03,0.04)  | 0.03 (-0.01,0.06)   | 0.23               | 0.00 (-0.01,0.01)     | 0.00 (-0.01,0.01)  | 0.00 (-0.01,0.01)  | 0.00 (-0.01,0.01)     |
| 3. Adjust. other dairy intake   | ref                               | 0.02 (-0.02,0.05)  | 0.00 (-0.04,0.04)  | 0.04 (0.00,0.08)    | 0.07               | 0.00 (0.00,0.01)      | 0.00 (-0.01,0.02)  | 0.01 (-0.01,0.02)  | 0.00 (-0.01,0.01)     |
| 4. Exclusion CHD                | ref                               | 0.02 (-0.02,0.06)  | 0.00 (-0.04,0.04)  | 0.04 (0.00,0.09)    | 0.05               | 0.00 (0.00,0.01)      | 0.00 (-0.01,0.02)  | 0.01 (0.00,0.02)   | 0.00 (-0.01,0.01)     |
| 5. Energy adjusted dairy        | ref                               | 0.00 (-0.04,0.04)  | 0.02 (-0.02,0.06)  | 0.03 (-0.01,0.07)   | 0.07               | 0.01 (-0.01,0.02)     | 0.00 (-0.01,0.02)  | 0.02 (0.00,0.05)*  | 0.00 (-0.02,0.02)     |
| <b>High-fat dairy</b>           |                                   |                    |                    |                     |                    |                       |                    |                    |                       |
| Main analysis model 2           | ref                               | 0.02 (-0.02,0.06)  | -0.03 (-0.07,0.01) | -0.03 (-0.07,0.01)  | 0.06               | -0.01 (-0.02,0.00)    | -0.01 (-0.02,0.01) | 0.00 (-0.02,0.01)  | -0.01 (-0.03,0.00)    |
| 1. Adjust. longitudinal WC      | ref                               | 0.02 (-0.01,0.05)  | -0.02 (-0.05,0.02) | -0.01 (-0.05,0.02)  | 0.18               | 0.00 (-0.01,0.00)     | -0.01 (-0.03,0.00) | 0.00 (-0.01,0.01)  | 0.00 (-0.01,0.01)     |
| 2. Adjust. CVD risk factors     | ref                               | 0.03 (0.00,0.06)   | 0.00 (-0.03,0.04)  | -0.01 (-0.05,0.03)  | 0.28               | -0.01 (-0.01,0.00)    | 0.00 (-0.02,0.01)  | 0.00 (-0.02,0.01)  | -0.01 (-0.02,0.01)    |
| 3. Adjust. other dairy intake   | ref                               | 0.03 (-0.01,0.06)  | -0.02 (-0.06,0.02) | -0.02 (-0.06,0.03)  | 0.23               | 0.00 (-0.01,0.00)     | 0.00 (-0.02,0.01)  | 0.00 (-0.01,0.01)  | -0.01 (-0.03,0.01)    |
| 4. Exclusion CHD                | ref                               | 0.02 (-0.02,0.06)  | -0.04 (-0.08,0.00) | -0.03 (-0.07,0.01)  | 0.075              | -0.01 (-0.02,0.00)    | -0.01 (-0.03,0.01) | 0.00 (-0.01,0.01)  | -0.01 (-0.03,0.00)    |
| 5. Energy adjusted dairy        | ref                               | -0.02 (-0.06,0.02) | -0.02 (-0.06,0.02) | -0.04 (-0.08,-0.01) | 0.02*              | -0.03 (-0.05,-0.01)** | -0.02 (-0.05,0.01) | -0.03 (-0.08,0.02) | -0.03 (-0.05,0.00)    |
| <b>Low-fat dairy</b>            |                                   |                    |                    |                     |                    |                       |                    |                    |                       |
| Main analysis model 2           | ref                               | 0.02 (-0.01,0.06)  | 0.06 (0.03,0.10)   | 0.06 (0.03,0.10)    | 0.0003***          | 0.02 (0.01,0.03)**    | 0.00 (-0.01,0.01)  | 0.02 (0.00,0.04)*  | 0.02 (0.00,0.04)*     |
| 1. Adjust. longitudinal WC      | ref                               | 0.00 (-0.03,0.03)  | 0.02 (-0.01,0.05)  | 0.01 (-0.02,0.05)   | 0.31               | 0.00 (-0.01,0.01)     | 0.00 (-0.01,0.02)  | 0.00 (-0.01,0.02)  | 0.00 (-0.02,0.01)     |
| 2. Adjust. CVD risk factors     | ref                               | 0.02 (-0.01,0.06)  | 0.05 (0.01,0.08)   | 0.04 (0.01,0.08)    | 0.005**            | 0.01 (0.00,0.02)      | 0.00 (-0.01,0.02)  | 0.02 (0.00,0.04)   | 0.01 (-0.01,0.02)     |
| 3. Adjust. other dairy intake   | ref                               | 0.02 (-0.02,0.06)  | 0.06 (0.02,0.10)   | 0.06 (0.02,0.10)    | 0.001***           | 0.01 (0.00,0.02)**    | 0.01 (-0.01,0.03)  | 0.02 (0.00,0.04)*  | 0.02 (0.00,0.03)      |
| 4. Exclusion CHD                | ref                               | 0.02 (-0.02,0.05)  | 0.06 (0.02,0.10)   | 0.07 (0.03,0.11)    | 0.0001***          | 0.02 (0.01,0.03)**    | 0.01 (0.00,0.03)   | 0.03 (0.00,0.05)*  | 0.02 (0.00,0.03)      |
| 5. Energy adjusted dairy        | ref                               | 0.01 (-0.02,0.05)  | 0.06 (0.02,0.09)   | 0.06 (0.02,0.10)    | 0.0007***          | 0.02 (0.01,0.03)**    | 0.01 (-0.01,0.03)  | 0.03 (0.01,0.05)** | 0.02 (0.00,0.04)      |
| <b>Total fermented dairy</b>    |                                   |                    |                    |                     |                    |                       |                    |                    |                       |
| Main analysis model 2           | ref                               | -0.02 (-0.06,0.02) | 0.00 (-0.04,0.04)  | -0.01 (-0.05,0.03)  | 0.77               | 0.00 (-0.01,0.00)     | -0.01 (-0.02,0.01) | 0.00 (-0.02,0.01)  | -0.01 (-0.02,0.01)    |
| 1. Adjust. longitudinal WC      | ref                               | -0.02 (-0.06,0.01) | -0.01 (-0.05,0.02) | -0.04 (-0.07,0.00)  | 0.13               | -0.01 (-0.01,0.00)    | -0.01 (-0.03,0.00) | 0.00 (-0.01,0.01)  | -0.01 (-0.02,0.01)    |
| 2. Adjust. CVD risk factors     | ref                               | -0.01 (-0.05,0.02) | 0.00 (-0.03,0.04)  | -0.02 (-0.05,0.02)  | 0.51               | 0.00 (-0.01,0.00)     | 0.00 (-0.02,0.01)  | -0.01 (-0.02,0.01) | 0.00 (-0.02,0.01)     |
| 3. Adjust. other dairy intake   | ref                               | -0.02 (-0.05,0.02) | 0.00 (-0.04,0.04)  | -0.01 (-0.05,0.03)  | 0.87               | 0.00 (-0.01,0.01)     | 0.00 (-0.02,0.01)  | 0.00 (-0.01,0.01)  | 0.00 (-0.02,0.01)     |
| 4. Exclusion CHD                | ref                               | -0.02 (-0.06,0.02) | -0.01 (-0.05,0.03) | -0.02 (-0.07,0.02)  | 0.49               | 0.00 (-0.01,0.01)     | 0.00 (-0.02,0.01)  | 0.00 (-0.01,0.01)  | -0.01 (-0.02,0.01)    |
| 5. Energy adjusted dairy        | ref                               | 0.00 (-0.04,0.04)  | 0.01 (-0.03,0.04)  | -0.03 (-0.07,0.01)  | 0.15               | -0.02 (-0.03,0.00)*   | -0.01 (-0.04,0.01) | -0.01 (-0.04,0.03) | -0.03 (-0.06,0.00)*   |
| <b>High-fat fermented dairy</b> |                                   |                    |                    |                     |                    |                       |                    |                    |                       |
| Main analysis model 2           | ref                               | 0.02 (-0.02,0.06)  | -0.01 (-0.05,0.02) | -0.01 (-0.05,0.03)  | 0.49               | 0.00 (-0.01,0.01)     | 0.01 (-0.01,0.02)  | 0.00 (-0.02,0.01)  | -0.01 (-0.03,0.01)    |
| 1. Adjust. longitudinal WC      | ref                               | 0.03 (0.00,0.06)   | 0.00 (-0.03,0.03)  | 0.00 (-0.03,0.04)   | 0.77               | 0.00 (-0.01,0.01)     | -0.02 (-0.03,0.00) | 0.00 (-0.01,0.01)  | 0.01 (-0.01,0.02)     |
| 2. Adjust. CVD risk factors     | ref                               | 0.03 (0.00,0.06)   | 0.01 (-0.02,0.05)  | 0.00 (-0.04,0.03)   | 0.72               | 0.00 (-0.01,0.01)     | 0.00 (-0.02,0.02)  | -0.01 (-0.02,0.01) | 0.00 (-0.02,0.02)     |
| 3. Adjust. other dairy intake   | ref                               | 0.03 (-0.01,0.06)  | -0.01 (-0.05,0.03) | 0.00 (-0.04,0.04)   | 0.81               | 0.00 (-0.01,0.01)     | 0.00 (-0.02,0.02)  | 0.00 (-0.01,0.01)  | -0.01 (-0.03,0.01)    |
| 4. Exclusion CHD                | ref                               | 0.02 (-0.02,0.06)  | -0.02 (-0.06,0.02) | -0.02 (-0.06,0.03)  | 0.41               | 0.00 (-0.01,0.01)     | -0.01 (-0.03,0.01) | 0.00 (-0.01,0.01)  | -0.01 (-0.03,0.01)    |
| 5. Energy adjusted dairy        | ref                               | -0.02 (-0.05,0.02) | -0.01 (-0.05,0.03) | -0.05 (-0.09,-0.01) | 0.02*              | -0.08 (-0.13,-0.03)** | -0.05 (-0.14,0.03) | -0.06 (-0.17,0.04) | -0.12 (-0.21,-0.04)** |
| <b>Low-fat fermented dairy</b>  |                                   |                    |                    |                     |                    |                       |                    |                    |                       |
| Main analysis model 2           | ref                               | 0.05 (0.01,0.08)   | 0.04 (0.00,0.08)   | 0.02 (-0.01,0.06)   | 0.70               | 0.00 (-0.01,0.01)     | -0.01 (-0.02,0.01) | 0.00 (-0.03,0.02)  | 0.00 (-0.02,0.02)     |
| 1. Adjust. longitudinal WC      | ref                               | 0.03 (0.00,0.06)   | 0.00 (-0.03,0.04)  | -0.02 (-0.05,0.02)  | 0.05               | -0.01 (-0.02,0.00)*   | -0.01 (-0.02,0.01) | -0.01 (-0.04,0.01) | -0.02 (-0.04,0.00)*   |
| 2. Adjust. CVD risk factors     | ref                               | 0.03 (0.00,0.06)   | 0.03 (-0.01,0.06)  | 0.01 (-0.03,0.05)   | 0.93               | -0.01 (-0.02,0.01)    | -0.01 (-0.02,0.01) | -0.01 (-0.03,0.02) | -0.01 (-0.02,0.01)    |
| 3. Adjust. other dairy intake   | ref                               | 0.05 (0.01,0.08)   | 0.04 (0.00,0.08)   | 0.03 (-0.01,0.07)   | 0.58               | 0.00 (-0.01,0.01)     | 0.00 (-0.02,0.02)  | 0.00 (-0.03,0.02)  | 0.00 (-0.02,0.02)     |
| 4. Exclusion CHD                | ref                               | 0.05 (0.01,0.09)   | 0.04 (0.00,0.08)   | 0.03 (-0.02,0.07)   | 0.75               | 0.00 (-0.01,0.01)     | 0.00 (-0.02,0.03)  | 0.00 (-0.03,0.03)  | 0.00 (-0.02,0.02)     |
| 5. Energy adjusted dairy        | ref                               | 0.06 (0.02,0.10)   | 0.05 (0.01,0.09)   | 0.02 (-0.02,0.05)   | 0.76               | -0.01 (-0.03,0.01)    | -0.01 (-0.03,0.02) | 0.00 (-0.04,0.03)  | -0.02 (-0.05,0.01)    |
| <b>Total milk</b>               |                                   |                    |                    |                     |                    |                       |                    |                    |                       |
| Main analysis model 2           | ref                               | 0.03 (-0.01,0.07)  | 0.03 (0.00,0.07)   | 0.05 (0.01,0.09)    | 0.02*              | 0.01 (0.00,0.02)      | -0.01 (-0.02,0.01) | 0.03 (0.01,0.06)** | 0.01 (-0.01,0.02)     |
| 1. Adjust. longitudinal WC      | ref                               | 0.02 (-0.01,0.05)  | 0.02 (-0.02,0.05)  | 0.02 (-0.01,0.06)   | 0.25               | 0.00 (-0.01,0.01)     | 0.00 (-0.02,0.01)  | 0.02 (0.00,0.04)** | 0.00 (-0.02,0.02)     |
| 2. Adjust. CVD risk factors     | ref                               | 0.04 (0.01,0.08)   | 0.04 (0.01,0.08)   | 0.05 (0.02,0.09)    | 0.01*              | 0.01 (0.00,0.02)      | 0.00 (-0.02,0.02)  | 0.03 (0.01,0.06)** | 0.00 (-0.01,0.02)     |
| 3. Adjust. other dairy intake   | ref                               | 0.03 (-0.01,0.07)  | 0.04 (0.00,0.07)   | 0.05 (0.01,0.09)    | 0.02*              | 0.01 (0.00,0.02)      | 0.00 (-0.02,0.02)  | 0.03 (0.01,0.06)** | 0.00 (-0.01,0.02)     |
| 4. Exclusion CHD                | ref                               | 0.03 (-0.01,0.07)  | 0.04 (0.00,0.08)   | 0.06 (0.02,0.10)    | 0.004*             | 0.02 (0.00,0.03)*     | 0.01 (-0.01,0.03)  | 0.04 (0.01,0.06)** | 0.01 (-0.01,0.03)     |
| 5. Energy adjusted dairy        | ref                               | 0.01 (-0.03,0.05)  | 0.04 (0.00,0.07)   | 0.04 (0.00,0.08)    | 0.01*              | 0.01 (0.00,0.02)      | 0.00 (-0.01,0.02)  | 0.03 (0.01,0.06)*  | 0.01 (-0.01,0.02)     |
| <b>High-fat milk</b>            |                                   |                    |                    |                     |                    |                       |                    |                    |                       |
| Main analysis model 2           | ref                               | 0.00 (-0.04,0.04)  | -0.03 (-0.06,0.01) | 0.00 (-0.04,0.03)   | 0.46               | -0.02 (-0.04,0.00)    | -0.01 (-0.04,0.01) | -0.02 (-0.08,0.04) | -0.02 (-0.05,0.00)    |

|                               |     |                    |                    |                     |           |                       |                    |                    |                       |
|-------------------------------|-----|--------------------|--------------------|---------------------|-----------|-----------------------|--------------------|--------------------|-----------------------|
| 1. Adjust. longitudinal WC    | ref | 0.02 (-0.01,0.06)  | 0.00 (-0.04,0.03)  | 0.01 (-0.02,0.04)   | 0.95      | -0.01 (-0.03,0.01)    | 0.00 (-0.04,0.03)  | -0.02 (-0.06,0.03) | -0.01 (-0.03,0.01)    |
| 2. Adjust. CVD risk factors   | ref | 0.01 (-0.03,0.04)  | -0.01 (-0.05,0.02) | 0.01 (-0.02,0.05)   | 0.77      | -0.01 (-0.03,0.00)    | -0.01 (-0.04,0.02) | -0.01 (-0.06,0.04) | -0.01 (-0.04,0.01)    |
| 3. Adjust. other dairy intake | ref | 0.00 (-0.04,0.04)  | -0.02 (-0.06,0.01) | 0.00 (-0.04,0.04)   | 0.65      | -0.02 (-0.04,0.00)    | -0.01 (-0.05,0.02) | 0.00 (-0.06,0.05)  | -0.02 (-0.05,0.01)    |
| 4. Exclusion CHD              | ref | -0.01 (-0.06,0.03) | -0.04 (-0.08,0.00) | -0.01 (-0.05,0.03)  | 0.47      | -0.01 (-0.03,0.01)    | 0.00 (-0.04,0.04)  | -0.01 (-0.07,0.05) | -0.02 (-0.05,0.01)    |
| 5. Energy adjusted dairy      | ref | -0.03 (-0.07,0.02) | -0.04 (-0.08,0.00) | 0.01 (-0.03,0.05)   | 0.85      | -0.02 (-0.04,0.00)    | -0.01 (-0.05,0.02) | -0.02 (-0.08,0.04) | -0.02 (-0.05,0.00)    |
| <b>Low-fat milk</b>           |     |                    |                    |                     |           |                       |                    |                    |                       |
| Main analysis model 2         | ref | 0.02 (-0.02,0.06)  | 0.02 (-0.02,0.06)  | 0.07 (0.03,0.11)    | 0.001**   | 0.02 (0.01,0.04)**    | 0.00 (-0.01,0.02)  | 0.04 (0.01,0.06)** | 0.04 (0.01,0.06)**    |
| 1. Adjust. longitudinal WC    | ref | 0.01 (-0.02,0.04)  | 0.01 (-0.03,0.04)  | 0.03 (0.00,0.06)    | 0.15      | 0.01 (0.00,0.02)      | 0.00 (-0.02,0.02)  | 0.02 (0.00,0.04)*  | 0.01 (-0.01,0.04)     |
| 2. Adjust. CVD risk factors   | ref | 0.02 (-0.02,0.05)  | 0.02 (-0.01,0.05)  | 0.06 (0.02,0.09)    | 0.002**   | 0.02 (0.01,0.03)**    | 0.01 (-0.01,0.02)  | 0.04 (0.01,0.06)** | 0.02 (0.00,0.05)      |
| 3. Adjust. other dairy intake | ref | 0.02 (-0.02,0.06)  | 0.02 (-0.02,0.06)  | 0.07 (0.03,0.10)    | 0.002**   | 0.02 (0.01,0.04)**    | 0.01 (-0.01,0.03)  | 0.04 (0.01,0.06)** | 0.03 (0.01,0.06)**    |
| 4. Exclusion CHD              | ref | 0.03 (-0.01,0.07)  | 0.03 (-0.01,0.07)  | 0.08 (0.04,0.12)    | 0.0004*** | 0.03 (0.01,0.04)***   | 0.01 (-0.01,0.03)  | 0.04 (0.01,0.07)** | 0.04 (0.01,0.07)      |
| 5. Energy adjusted dairy      | ref | 0.03 (-0.01,0.06)  | 0.03 (-0.01,0.06)  | 0.08 (0.04,0.11)    | 0.0002*** | 0.02 (0.01,0.04)***   | 0.01 (-0.01,0.03)  | 0.04 (0.01,0.06)** | 0.04 (0.01,0.06)*     |
| <b>Total yogurt</b>           |     |                    |                    |                     |           |                       |                    |                    |                       |
| Main analysis model 2         | ref | 0.04 (0.01,0.08)   | 0.00 (-0.04,0.04)  | -0.01 (-0.05,0.02)  | 0.18      | -0.02 (-0.04,0.00)    | -0.01 (-0.04,0.03) | -0.01 (-0.06,0.05) | -0.03 (-0.06,0.00)    |
| 1. Adjust. longitudinal WC    | ref | 0.03 (0.00,0.06)   | 0.00 (-0.03,0.04)  | -0.02 (-0.05,0.02)  | 0.14      | -0.02 (-0.04,0.00)    | -0.01 (-0.05,0.03) | -0.01 (-0.05,0.04) | -0.02 (-0.05,0.00)    |
| 2. Adjust. CVD risk factors   | ref | 0.03 (0.00,0.07)   | 0.00 (-0.03,0.04)  | -0.02 (-0.05,0.01)  | 0.12      | -0.02 (-0.04,0.00)    | -0.01 (-0.05,0.03) | -0.01 (-0.06,0.04) | -0.03 (-0.06,0.00)*   |
| 3. Adjust. other dairy intake | ref | 0.04 (0.01,0.08)   | 0.00 (-0.04,0.04)  | -0.01 (-0.05,0.03)  | 0.23      | -0.02 (-0.04,0.01)    | 0.00 (-0.05,0.04)  | 0.00 (-0.06,0.05)  | -0.03 (-0.06,0.00)    |
| 4. Exclusion CHD              | ref | 0.05 (0.01,0.09)   | 0.01 (-0.03,0.06)  | -0.01 (-0.05,0.03)  | 0.27      | -0.02 (-0.04,0.01)    | 0.00 (-0.05,0.04)  | 0.02 (-0.04,0.08)  | -0.03 (-0.06,0.00)    |
| 5. Energy adjusted dairy      | ref | 0.03 (0.00,0.07)   | 0.01 (-0.03,0.04)  | -0.02 (-0.05,0.02)  | 0.12      | -0.02 (-0.04,0.00)    | -0.01 (-0.05,0.04) | -0.01 (-0.06,0.04) | -0.03 (-0.06,0.00)    |
| <b>High-fat yogurt</b>        |     |                    |                    |                     |           |                       |                    |                    |                       |
| Main analysis model 2         | ref | -0.01 (-0.06,0.04) | 0.00 (-0.05,0.05)  | -0.10 (-0.16,-0.05) | 0.0003*** | -0.08 (-0.13,-0.03)** | 0.01 (-0.01,0.02)  | -0.11 (-0.25,0.03) | -0.11 (-0.18,-0.03)** |
| 1. Adjust. longitudinal WC    | ref | 0.01 (-0.03,0.05)  | 0.02 (-0.02,0.06)  | -0.06 (-0.10,-0.01) | 0.04*     | -0.04 (-0.08,0.01)    | -0.02 (-0.09,0.04) | -0.05 (-0.17,0.07) | -0.05 (-0.11,0.02)    |
| 2. Adjust. CVD risk factors   | ref | -0.01 (-0.06,0.03) | -0.01 (-0.06,0.03) | -0.07 (-0.12,-0.02) | 0.005**   | -0.05 (-0.10,-0.01)*  | -0.02 (-0.08,0.05) | -0.09 (-0.22,0.05) | -0.08 (-0.15,-0.01)*  |
| 3. Adjust. other dairy intake | ref | -0.01 (-0.06,0.04) | 0.00 (-0.05,0.05)  | -0.10 (-0.16,-0.05) | 0.0004*** | -0.07 (-0.12,-0.03)** | -0.04 (-0.11,0.03) | -0.10 (-0.24,0.04) | -0.11 (-0.18,-0.03)*  |
| 4. Exclusion CHD              | ref | -0.01 (-0.06,0.04) | -0.02 (-0.07,0.03) | -0.11 (-0.17,-0.05) | 0.0009*** | -0.07 (-0.12,-0.02)** | -0.04 (-0.11,0.04) | -0.09 (-0.24,0.07) | -0.11 (-0.19,-0.03)*  |
| 5. Energy adjusted dairy      | ref | -0.03 (-0.08,0.02) | 0.03 (-0.02,0.08)  | -0.11 (-0.16,-0.06) | 0.0001*** | -0.08 (-0.13,-0.03)** | -0.04 (-0.11,0.03) | -0.11 (-0.25,0.03) | -0.11 (-0.19,-0.03)*  |
| <b>Low-fat yogurt</b>         |     |                    |                    |                     |           |                       |                    |                    |                       |
| Main analysis model 2         | ref | 0.03 (0.00,0.07)   | 0.07 (0.03,0.10)   | 0.01 (-0.02,0.05)   | 0.52      | 0.00 (-0.03,0.02)     | -0.02 (-0.06,0.03) | 0.01 (-0.05,0.06)  | -0.01 (-0.04,0.02)    |
| 1. Adjust. longitudinal WC    | ref | 0.02 (-0.01,0.05)  | 0.05 (0.02,0.08)   | 0.00 (-0.03,0.03)   | 0.77      | -0.01 (-0.03,0.01)    | 0.00 (-0.05,0.04)  | 0.00 (-0.05,0.04)  | -0.02 (-0.04,0.01)    |
| 2. Adjust. CVD risk factors   | ref | 0.03 (-0.01,0.06)  | 0.05 (0.01,0.08)   | 0.00 (-0.03,0.03)   | 0.94      | -0.01 (-0.03,0.01)    | -0.01 (-0.05,0.04) | 0.00 (-0.05,0.05)  | -0.02 (-0.05,0.01)    |
| 3. Adjust. other dairy intake | ref | 0.03 (0.00,0.07)   | 0.07 (0.03,0.10)   | 0.02 (-0.02,0.05)   | 0.47      | 0.00 (-0.03,0.02)     | 0.01 (-0.04,0.06)  | 0.01 (-0.04,0.07)  | -0.01 (-0.04,0.02)    |
| 4. Exclusion CHD              | ref | 0.04 (0.00,0.08)   | 0.07 (0.03,0.11)   | 0.02 (-0.02,0.06)   | 0.47      | 0.00 (-0.02,0.02)     | 0.01 (-0.04,0.07)  | 0.04 (-0.02,0.10)  | -0.01 (-0.05,0.02)    |
| 5. Energy adjusted dairy      | ref | 0.04 (0.00,0.07)   | 0.06 (0.02,0.09)   | 0.02 (-0.02,0.05)   | 0.41      | 0.00 (-0.03,0.02)     | 0.01 (-0.04,0.06)  | 0.00 (-0.05,0.06)  | -0.01 (-0.04,0.02)    |
| <b>Total cheese</b>           |     |                    |                    |                     |           |                       |                    |                    |                       |
| Main analysis model 2         | ref | 0.02 (-0.02,0.06)  | 0.00 (-0.04,0.04)  | 0.01 (-0.03,0.05)   | 0.62      | 0.00 (-0.01,0.01)     | -0.05 (-0.12,0.02) | 0.00 (-0.02,0.01)  | 0.01 (-0.01,0.02)     |
| 1. Adjust. longitudinal WC    | ref | 0.00 (-0.03,0.03)  | -0.02 (-0.05,0.01) | -0.01 (-0.05,0.02)  | 0.40      | 0.00 (-0.01,0.00)     | -0.01 (-0.03,0.00) | 0.00 (-0.01,0.01)  | 0.00 (-0.01,0.02)     |
| 2. Adjust. CVD risk factors   | ref | 0.03 (-0.01,0.06)  | 0.01 (-0.03,0.04)  | 0.01 (-0.03,0.04)   | 0.98      | 0.00 (-0.01,0.01)     | 0.00 (-0.02,0.02)  | -0.01 (-0.02,0.01) | 0.01 (-0.01,0.02)     |
| 3. Adjust. other dairy intake | ref | 0.02 (-0.02,0.06)  | 0.00 (-0.04,0.04)  | 0.02 (-0.03,0.07)   | 0.31      | 0.01 (0.00,0.02)      | 0.01 (-0.02,0.03)  | 0.02 (0.00,0.05)   | 0.00 (-0.02,0.03)     |
| 4. Exclusion CHD              | ref | 0.02 (-0.02,0.06)  | -0.01 (-0.05,0.04) | 0.01 (-0.03,0.05)   | 0.69      | 0.00 (-0.01,0.01)     | 0.00 (-0.02,0.02)  | 0.00 (-0.01,0.01)  | 0.00 (-0.01,0.02)     |
| 5. Energy adjusted dairy      | ref | 0.01 (-0.02,0.05)  | 0.00 (-0.04,0.04)  | 0.01 (-0.03,0.05)   | 0.53      | 0.00 (-0.01,0.01)     | 0.00 (-0.02,0.02)  | 0.00 (-0.02,0.01)  | 0.01 (-0.01,0.02)     |
| <b>High-fat cheese</b>        |     |                    |                    |                     |           |                       |                    |                    |                       |
| Main analysis model 2         | ref | 0.01 (-0.02,0.05)  | 0.00 (-0.04,0.04)  | 0.00 (-0.04,0.04)   | 0.92      | 0.00 (-0.01,0.01)     | 0.00 (-0.05,0.05)  | 0.00 (-0.01,0.01)  | 0.00 (-0.02,0.02)     |
| 1. Adjust. longitudinal WC    | ref | 0.02 (-0.01,0.05)  | 0.01 (-0.03,0.04)  | 0.01 (-0.03,0.04)   | 0.90      | 0.00 (-0.01,0.01)     | -0.02 (-0.03,0.00) | 0.00 (-0.01,0.01)  | 0.01 (-0.01,0.03)     |
| 2. Adjust. CVD risk factors   | ref | 0.02 (-0.01,0.06)  | 0.02 (-0.02,0.05)  | 0.00 (-0.03,0.04)   | 0.92      | 0.00 (-0.01,0.01)     | 0.00 (-0.02,0.02)  | 0.00 (-0.02,0.01)  | 0.00 (-0.01,0.02)     |
| 3. Adjust. other dairy intake | ref | 0.02 (-0.02,0.05)  | 0.00 (-0.04,0.04)  | 0.01 (-0.04,0.05)   | 0.56      | 0.01 (-0.01,0.02)     | 0.00 (-0.02,0.03)  | 0.02 (0.00,0.05)   | 0.00 (-0.03,0.02)     |
| 4. Exclusion CHD              | ref | 0.02 (-0.02,0.06)  | -0.01 (-0.05,0.03) | -0.01 (-0.05,0.04)  | 0.72      | 0.00 (-0.01,0.01)     | -0.01 (-0.03,0.01) | 0.00 (-0.01,0.02)  | 0.00 (-0.02,0.02)     |
| 5. Energy adjusted dairy      | ref | 0.00 (-0.04,0.04)  | -0.01 (-0.05,0.03) | -0.01 (-0.05,0.03)  | 0.96      | 0.00 (-0.01,0.01)     | 0.00 (-0.02,0.02)  | 0.00 (-0.01,0.01)  | 0.00 (-0.02,0.02)     |
| <b>Low-fat cheese</b>         |     |                    |                    |                     |           |                       |                    |                    |                       |
| Main analysis model 2         | ref | 0.02 (-0.02,0.07)  | 0.01 (-0.04,0.06)  | 0.02 (-0.03,0.07)   | 0.50      | 0.01 (-0.01,0.03)     | 0.00 (-0.02,0.02)  | -0.01 (-0.06,0.03) | 0.02 (-0.01,0.05)     |
| 1. Adjust. longitudinal WC    | ref | 0.02 (-0.02,0.06)  | -0.03 (-0.07,0.01) | -0.03 (-0.07,0.01)  | 0.09      | -0.01 (-0.03,0.01)    | 0.02 (-0.02,0.05)  | -0.03 (-0.07,0.00) | -0.01 (-0.04,0.01)    |
| 2. Adjust. CVD risk factors   | ref | 0.00 (-0.04,0.04)  | -0.01 (-0.05,0.04) | -0.01 (-0.05,0.03)  | 0.46      | 0.00 (-0.02,0.02)     | -0.01 (-0.04,0.03) | -0.03 (-0.07,0.01) | 0.01 (-0.02,0.04)     |
| 3. Adjust. other dairy intake | ref | 0.02 (-0.02,0.07)  | 0.02 (-0.03,0.06)  | 0.02 (-0.03,0.08)   | 0.35      | 0.02 (-0.01,0.04)     | 0.02 (-0.02,0.06)  | 0.01 (-0.04,0.06)  | 0.02 (-0.02,0.05)     |
| 4. Exclusion CHD              | ref | 0.01 (-0.03,0.06)  | 0.02 (-0.03,0.07)  | 0.02 (-0.03,0.07)   | 0.46      | 0.01 (-0.01,0.03)     | 0.03 (-0.02,0.07)  | 0.00 (-0.05,0.04)  | 0.01 (-0.02,0.04)     |
| 5. Energy adjusted dairy      | ref | 0.02 (-0.03,0.07)  | 0.01 (-0.04,0.06)  | 0.02 (-0.03,0.07)   | 0.49      | 0.01 (-0.01,0.03)     | 0.02 (-0.02,0.06)  | -0.01 (-0.06,0.03) | 0.02 (-0.01,0.05)     |
| <b>Cream</b>                  |     |                    |                    |                     |           |                       |                    |                    |                       |
| Main analysis model 2         | ref | -0.03 (-0.07,0.02) | -0.05 (-0.09,0.00) | -0.07 (-0.12,-0.03) | 0.77      | -0.02 (-0.05,0.01)    | 0.00 (-0.02,0.01)  | -0.13 (-0.26,0.00) | -0.10 (-0.19,-0.02)*  |
| 1. Adjust. longitudinal WC    | ref | -0.01 (-0.05,0.02) | -0.03 (-0.07,0.01) | -0.03 (-0.07,0.01)  | 0.62      | -0.01 (-0.03,0.02)    | 0.00 (-0.02,0.03)  | -0.04 (-0.16,0.07) | -0.05 (-0.12,0.02)*   |

|                               |     |                    |                    |                     |      |                    |                    |                    |                      |
|-------------------------------|-----|--------------------|--------------------|---------------------|------|--------------------|--------------------|--------------------|----------------------|
| 2. Adjust. CVD risk factors   | ref | -0.01 (-0.05,0.03) | -0.03 (-0.07,0.01) | -0.03 (-0.07,0.01)  | 0.67 | -0.01 (-0.03,0.02) | 0.00 (-0.02,0.03)  | -0.11 (-0.23,0.02) | -0.03 (-0.11,0.04)   |
| 3. Adjust. other dairy intake | ref | -0.03 (-0.07,0.02) | -0.05 (-0.09,0.00) | -0.07 (-0.12,-0.02) | 0.94 | -0.02 (-0.05,0.01) | 0.00 (-0.03,0.03)  | -0.10 (-0.24,0.03) | -0.11 (-0.20,-0.02)* |
| 4. Exclusion CHD              | ref | -0.03 (-0.07,0.02) | -0.05 (-0.10,0.00) | -0.08 (-0.13,-0.03) | 0.93 | -0.02 (-0.05,0.01) | 0.00 (-0.03,0.04)  | -0.13 (-0.27,0.01) | -0.11 (-0.20,-0.02)* |
| 5. Energy adjusted dairy      | ref | -0.04 (-0.09,0.00) | -0.01 (-0.06,0.03) | -0.08 (-0.13,-0.04) | 0.51 | -0.02 (-0.05,0.01) | 0.00 (-0.03,0.03)  | -0.12 (-0.26,0.01) | -0.10 (-0.19,-0.01)* |
| <b>Ice cream</b>              |     |                    |                    |                     |      |                    |                    |                    |                      |
| Main analysis model 2         | ref | 0.03 (-0.02,0.07)  | 0.02 (-0.02,0.07)  | 0.01 (-0.03,0.05)   | 0.52 | 0.04 (-0.01,0.08)  | 0.01 (-0.03,0.05)  | 0.06 (0.00,0.11)*  | -0.02 (-0.12,0.08)   |
| 1. Adjust. longitudinal WC    | ref | 0.02 (-0.01,0.06)  | 0.02 (-0.02,0.06)  | 0.00 (-0.03,0.04)   | 0.72 | 0.00 (-0.04,0.04)  | -0.05 (-0.21,0.11) | 0.01 (-0.04,0.05)  | -0.01 (-0.09,0.08)   |
| 2. Adjust. CVD risk factors   | ref | 0.03 (-0.01,0.07)  | 0.04 (0.00,0.08)   | 0.02 (-0.02,0.05)   | 0.18 | 0.04 (0.00,0.08)   | -0.05 (-0.21,0.12) | 0.06 (0.01,0.11)*  | -0.01 (-0.10,0.08)   |
| 3. Adjust. other dairy intake | ref | 0.03 (-0.02,0.07)  | 0.02 (-0.02,0.07)  | 0.01 (-0.03,0.05)   | 0.42 | 0.05 (0.00,0.10)*  | -0.04 (-0.21,0.14) | 0.08 (0.03,0.14)** | -0.02 (-0.13,0.08)   |
| 4. Exclusion CHD              | ref | 0.02 (-0.02,0.07)  | 0.03 (-0.02,0.07)  | 0.01 (-0.03,0.05)   | 0.47 | 0.04 (-0.01,0.09)  | -0.04 (-0.24,0.15) | 0.06 (0.01,0.11)*  | -0.01 (-0.11,0.09)   |
| 5. Energy adjusted dairy      | ref | 0.05 (0.01,0.09)   | 0.00 (-0.04,0.04)  | 0.00 (-0.04,0.05)   | 0.58 | 0.03 (-0.01,0.08)  | -0.03 (-0.20,0.13) | 0.06 (0.00,0.11)*  | -0.02 (-0.12,0.08)   |

Model 2 included age (continuous), sex and energy intake (continuous), education (3 categories), smoking (3 categories), physical activity (continuous), alcohol consumption (4 categories), family history of diabetes (yes/no, RS-I and RS-II only) and intakes of fruit, vegetables, wholegrains, legumes, nuts, tea, coffee, red meat and sugar-sweetened beverages (continuous). CVD, Cardiovascular Disease; CHD, Coronary Heart Disease; WC, Waist Circumference. P value significance level: \*.05, \*\*.01, \*\*\*.001

## Repeated measures of dairy intake

**Table S12.** Mean dairy intake at baseline and follow-up in a subsample of RS-I and RS-II ( $n=1887$ ).

|                                 | RS-I<br>n=1,028 |             | RS-II<br>n=859 |             |
|---------------------------------|-----------------|-------------|----------------|-------------|
|                                 | Baseline        | Follow-up   | Baseline       | Follow-up   |
| <b>Total dairy</b>              | 3.85 ± 1.69     | 4.21 ± 2.54 | 2.93 ± 1.80    | 2.83 ± 1.70 |
| <b>High-fat dairy</b>           | 2.12 ± 1.35     | 2.45 ± 2.23 | 1.40 ± 1.40    | 1.37 ± 1.38 |
| <b>Low-fat dairy</b>            | 1.72 ± 1.40     | 1.68 ± 1.49 | 1.53 ± 1.36    | 1.46 ± 1.17 |
| <b>Total fermented dairy</b>    | 2.70 ± 1.43     | 3.10 ± 2.30 | 1.98 ± 1.50    | 2.02 ± 1.43 |
| <b>High-fat fermented dairy</b> | 1.77 ± 1.18     | 2.20 ± 2.17 | 1.07 ± 1.18    | 1.11 ± 1.20 |
| <b>Low-fat fermented dairy</b>  | 0.93 ± 1.10     | 0.91 ± 1.11 | 0.92 ± 1.09    | 0.92 ± 0.99 |
| <b>Total milk</b>               | 1.43 ± 1.09     | 1.28 ± 1.20 | 1.00 ± 1.04    | 0.87 ± 0.91 |
| <b>High-fat milk</b>            | 0.23 ± 0.55     | 0.21 ± 0.50 | 0.25 ± 0.70    | 0.19 ± 0.55 |
| <b>Low-fat milk</b>             | 1.20 ± 1.09     | 1.07 ± 1.15 | 0.75 ± 0.80    | 0.68 ± 0.71 |
| <b>Total yogurt</b>             | 0.47 ± 0.49     | 0.36 ± 0.52 | 0.61 ± 0.78    | 0.59 ± 0.72 |
| <b>High-fat yogurt</b>          | 0.14 ± 0.29     | 0.03 ± 0.16 | 0.11 ± 0.42    | 0.08 ± 0.25 |
| <b>Low-fat yogurt</b>           | 0.33 ± 0.42     | 0.32 ± 0.52 | 0.50 ± 0.71    | 0.51 ± 0.71 |
| <b>Total cheese</b>             | 1.88 ± 1.11     | 2.47 ± 2.13 | 1.34 ± 1.25    | 1.41 ± 1.21 |
| <b>High-fat cheese</b>          | 1.66 ± 1.15     | 2.16 ± 2.16 | 0.95 ± 1.11    | 1.02 ± 1.17 |
| <b>Low-fat cheese</b>           | 0.22 ± 0.61     | 0.31 ± 0.70 | 0.39 ± 0.82    | 0.39 ± 0.66 |
| <b>Cream</b>                    | 0.26 ± 0.69     | 0.06 ± 0.20 | 0.12 ± 0.21    | 0.11 ± 0.21 |
| <b>Ice cream</b>                | 0.04 ± 0.11     | 0.12 ± 0.37 | 0.15 ± 0.35    | 0.15 ± 0.25 |

**Table S13.** Associations of dairy product types and prediabetes risk using repeated measures of dairy intakes as time-dependent exposure ( $n=6053$ ) or adjusting for dairy intake at follow-up ( $n=1707$ ).

|                           | RS-I<br>Continuous<br>HR (95%CI) | RS-II<br>Continuous<br>HR (95%CI) |
|---------------------------|----------------------------------|-----------------------------------|
| <b>Total dairy</b>        |                                  |                                   |
| Model 2                   | 1.08 (1.03-1.14)**               | 1.03 (0.98-1.08)                  |
| Time-dependent exposure   | 1.08 (1.02-1.14)**               | 1.01 (0.96-1.07)                  |
| Adjusted for FU intake    | 1.13 (1.04-1.22)**               | 1.01 (0.94-1.08)                  |
| <b>High-fat dairy</b>     |                                  |                                   |
| Model 2                   | 1.04 (0.98-1.12)                 | 1.00 (0.95-1.06)                  |
| Time-dependent exposure   | 1.04 (0.98-1.12)                 | 0.99 (0.93-1.05)                  |
| Adjusted for FU intake    | 1.09 (0.99-1.20)                 | 0.99 (0.92-1.07)                  |
| <b>Low-fat dairy</b>      |                                  |                                   |
| Model 2                   | 1.07 (1.01-1.14)*                | 1.06 (0.99-1.14)                  |
| Time-dependent exposure   | 1.07 (1.01-1.14)*                | 1.06 (0.99-1.14)                  |
| Adjusted for FU intake    | 1.08 (0.98-1.18)*                | 1.04 (0.94-1.15)                  |
| <b>Total fermented</b>    |                                  |                                   |
| Model 2                   | 1.06 (1.00-1.12)*                | 1.02 (0.97-1.07)                  |
| Time-dependent exposure   | 1.06 (1.00-1.12)*                | 1.00 (0.95-1.05)                  |
| Adjusted for FU intake    | 1.10 (1.01-1.20)                 | 1.01 (0.95-1.09)                  |
| <b>High-fat fermented</b> |                                  |                                   |
| Model 2                   | 1.07 (1.00-1.15)                 | 1.02 (0.96-1.07)                  |
| Time-dependent exposure   | 1.07 (1.00-1.15)                 | 0.99 (0.94-1.05)                  |
| Adjusted for FU intake    | 1.09 (0.98-1.22)                 | 1.01 (0.94-1.09)                  |
| <b>Low-fat fermented</b>  |                                  |                                   |
| Model 2                   | 1.03 (0.94-1.12)                 | 1.01 (0.91-1.11)                  |
| Time-dependent exposure   | 1.03 (0.94-1.12)                 | 1.01 (0.92-1.11)                  |
| Adjusted for FU intake    | 1.07 (0.95-1.20)                 | 1.02 (0.89-1.18)                  |
| <b>Total milk</b>         |                                  |                                   |
| Model 2                   | 1.06 (0.99-1.15)                 | 1.05 (0.95-1.16)                  |
| Time-dependent exposure   | 1.06 (0.99-1.15)                 | 1.07 (0.97-1.19)                  |
| Adjusted for FU intake    | 1.08 (0.96-1.21)                 | 0.94 (0.82-1.09)                  |
| <b>High-fat milk</b>      |                                  |                                   |
| Model 2                   | 0.95 (0.81-1.10)                 | 0.62 (0.43-0.91)*                 |

|                         |                    |                          |
|-------------------------|--------------------|--------------------------|
| Time-dependent exposure | 0.95 (0.81-1.10)   | 0.88 (0.67-1.15)         |
| Adjusted for FU intake  | 1.07 (0.89-1.28)   | 0.56 (0.34-0.91)*        |
| <b>Low-fat milk</b>     |                    |                          |
| Model 2                 | 1.08 (1.00-1.16)   | <b>1.11 (1.00-1.23)*</b> |
| Time-dependent exposure | 1.08 (1.00-1.16)   | 1.11 (1.00-1.23)         |
| Adjusted for FU intake  | 1.04 (0.92-1.17)   | 1.00 (0.87-1.15)         |
| <b>Total yogurt</b>     |                    |                          |
| Model 2                 | 0.98 (0.80-1.20)   | 0.91 (0.68-1.22)         |
| Time-dependent exposure | 0.89 (0.73-1.07)   | 1.03 (0.84-1.25)         |
| Adjusted for FU intake  | 0.91 (0.69-1.21)   | 1.06 (0.79-1.41)         |
| <b>High-fat yogurt</b>  |                    |                          |
| Model 2                 | 0.76 (0.54-1.07)   | 0.47 (0.20-1.10)         |
| Time-dependent exposure | 0.76 (0.54-1.07)   | 0.66 (0.34-1.30)         |
| Adjusted for FU intake  | 0.71 (0.44-1.15)   | 0.30 (0.08-1.21)         |
| <b>Low-fat yogurt</b>   |                    |                          |
| Model 2                 | 0.97 (0.78-1.21)   | 1.03 (0.82-1.29)         |
| Time-dependent exposure | 0.97 (0.78-1.21)   | 1.07 (0.89-1.30)         |
| Adjusted for FU intake  | 1.02 (0.74-1.41)   | 1.15 (0.87-1.51)         |
| <b>Total cheese</b>     |                    |                          |
| Model 2                 | 1.11 (1.04-1.19)** | 1.02 (0.97-1.08)         |
| Time-dependent exposure | 1.11 (1.04-1.19)** | 1.00 (0.94-1.05)         |
| Adjusted for FU intake  | 1.19 (1.06-1.33)** | 1.01 (0.94-1.09)         |
| <b>High-fat cheese</b>  |                    |                          |
| Model 2                 | 1.08 (1.01-1.16)*  | 1.02 (0.97-1.08)         |
| Time-dependent exposure | 1.08 (1.01-1.16)*  | 1.00 (0.94-1.06)         |
| Adjusted for FU intake  | 1.11 (0.99-1.24)*  | 1.01 (0.94-1.09)         |
| <b>Low-fat cheese</b>   |                    |                          |
| Model 2                 | 1.11 (0.97-1.27)   | 1.00 (0.88-1.14)         |
| Time-dependent exposure | 1.13 (1.00-1.28)   | 1.07 (0.90-1.28)         |
| Adjusted for FU intake  | 1.18 (0.99-1.41)   | 1.03 (0.83-1.27)         |
| <b>Cream</b>            |                    |                          |
| Model 2                 | 1.05 (0.93-1.18)   | 0.89 (0.50-1.59)         |
| Time-dependent exposure | 1.05 (0.93-1.18)   | 0.86 (0.48-1.55)         |
| Adjusted for FU intake  | 1.05 (0.89-1.24)   | 0.85 (0.44-1.64)         |
| <b>Ice cream</b>        |                    |                          |
| Model 2                 | 0.75 (0.34-1.65)   | 0.96 (0.65-1.43)         |
| Time-dependent exposure | 0.75 (0.34-1.65)   | 1.05 (0.72-1.53)         |
| Adjusted for FU intake  | 1.25 (0.38-4.05)   | 0.91 (0.56-1.49)         |

Model 2 included age (continuous), sex, energy intake (continuous), education (3 categories), smoking (3 categories), physical activity (continuous), alcohol consumption (4 categories), family history of diabetes (yes/no) and fruits, vegetables, wholegrains, legumes, nuts, tea, coffee, red meat and sugar-sweetened beverages (SSB) intakes (continuous). HR, Hazard Ratio. P value significance level: \*.05, \*\*.01, \*\*\*.001

**Table S14.** Associations of dairy product intakes and longitudinal insulin resistance with repeated measures of dairy intake as fixed effect in RS-I and RS-II ( $n=4274$ ).

|                       | <b>RS-I</b><br>n=1021<br>Continuous<br>B (95%CI) | <b>RS-II</b><br>n=857<br>Continuous<br>B (95%CI) |
|-----------------------|--------------------------------------------------|--------------------------------------------------|
| <b>Total dairy</b>    |                                                  |                                                  |
| Model 2               | 0.00 (-0.01,0.02)                                | 0.01 (-0.01,0.02)                                |
| Repeated measures     | -0.01 (-0.02, 0.00)                              | 0.00 (-0.01, 0.01)                               |
| <b>High-fat dairy</b> |                                                  |                                                  |
| Model 2               | -0.01 (-0.02,0.01)                               | 0.00 (-0.02,0.01)                                |
| Repeated measures     | -0.01 (-0.02, 0.01)                              | 0.00 (-0.01, 0.01)                               |
| <b>Low-fat dairy</b>  |                                                  |                                                  |
| Model 2               | 0.01 (0.00,0.03)                                 | 0.02 (0.00,0.04)*                                |
| Repeated measures     | 0.00 (-0.01, 0.01)                               | 0.01 (-0.01, 0.02)                               |

|                           |                        |                     |
|---------------------------|------------------------|---------------------|
| <b>Total fermented</b>    |                        |                     |
| Model 2                   | 0.00 (-0.02,0.01)      | 0.00 (-0.02,0.01)   |
| Repeated measures         | -0.01 (-0.02, 0.01)    | 0.00 (-0.01, 0.01)  |
| <b>High-fat fermented</b> |                        |                     |
| Model 2                   | 0.00 (-0.02,0.01)      | 0.00 (-0.02,0.01)   |
| Repeated measures         | 0.00 (-0.02, 0.01)     | 0.00 (-0.02, 0.01)  |
| <b>Low-fat fermented</b>  |                        |                     |
| Model 2                   | 0.00 (-0.02,0.02)      | 0.00 (-0.03,0.02)   |
| Repeated measures         | -0.01 (-0.03, 0.01)    | 0.00 (-0.02, 0.02)  |
| <b>Total milk</b>         |                        |                     |
| Model 2                   | 0.00 (-0.02,0.02)      | 0.03 (0.01,0.06)**  |
| Repeated measures         | -0.01 (-0.02, 0.01)    | 0.01 (-0.01, 0.03)  |
| <b>High-fat milk</b>      |                        |                     |
| Model 2                   | -0.02 (-0.05,0.02)     | -0.02 (-0.08,0.04)  |
| Repeated measures         | -0.02 (-0.05, 0.01)    | 0.00 (-0.04, 0.05)  |
| <b>Low-fat milk</b>       |                        |                     |
| Model 2                   | 0.01 (-0.01,0.03)      | 0.04 (0.01,0.06)**  |
| Repeated measures         | 0.00 (-0.02, 0.01)     | 0.02 (-0.01, 0.04)  |
| <b>Total yogurt</b>       |                        |                     |
| Model 2                   | -0.01 (-0.05,0.04)     | -0.01 (-0.06,0.05)  |
| Repeated measures         | -0.03 (-0.06, 0.00)    | 0.02 (-0.01, 0.06)  |
| <b>High-fat yogurt</b>    |                        |                     |
| Model 2                   | -0.04 (-0.11,0.03)     | -0.11 (-0.25,0.03)  |
| Repeated measures         | -0.07 (-0.12, -0.02)** | 0.04 (-0.05, 0.13)  |
| <b>Low-fat yogurt</b>     |                        |                     |
| Model 2                   | 0.01 (-0.04,0.06)      | 0.01 (-0.05,0.06)   |
| Repeated measures         | -0.02 (-0.05, 0.02)    | 0.02 (-0.02, 0.07)  |
| <b>Total cheese</b>       |                        |                     |
| Model 2                   | 0.00 (-0.02,0.02)      | 0.00 (-0.02,0.01)   |
| Repeated measures         | 0.00 (-0.01, 0.02)     | -0.01 (-0.02, 0.00) |
| <b>High-fat cheese</b>    |                        |                     |
| Model 2                   | 0.00 (-0.02,0.02)      | 0.00 (-0.01,0.01)   |
| Repeated measures         | 0.00 (-0.01, 0.02)     | -0.01 (-0.02, 0.00) |
| <b>Low-fat cheese</b>     |                        |                     |
| Model 2                   | 0.02 (-0.02,0.06)      | -0.01 (-0.06,0.03)  |
| Repeated measures         | 0.00 (-0.03, 0.02)     | -0.02 (-0.05, 0.01) |
| <b>Cream</b>              |                        |                     |
| Model 2                   | 0.00 (-0.03,0.03)      | -0.13 (-0.26,0.00)  |
| Repeated measures         | 0.01 (-0.02, 0.04)     | -0.02 (-0.12, 0.07) |
| <b>Ice cream</b>          |                        |                     |
| Model 2                   | -0.04 (-0.21,0.13)     | 0.06 (0.00,0.11)*   |
| Repeated measures         | 0.06 (-0.02, 0.13)     | 0.04 (0.00, 0.09)   |

---

Model 2 included age (continuous), sex, energy intake (continuous), education (3 categories), smoking (3 categories), physical activity (continuous), alcohol consumption (4 categories), family history of diabetes (yes/no) and fruits, vegetables, wholegrains, legumes, nuts, tea, coffee, red meat and sugar-sweetened beverages (SSB) intakes (continuous). P value significance level: \*.05, \*\*.01, \*\*\*.001
